# Supplementary material for: Aglycone mimics for tuning of glycosidase inhibition: design, synthesis and biological evaluation of bicyclic pyrrolidotriazole iminosugars
Source: Royal Society of Chemistry journal article supplement (doi:10.1039/c5ra26005a), 2016-01-01
Supplement: c5ra26005a1.pdf [file c5ra26005a1.pdf]

## Electronic Supplementary Information

### **Aglycone Mimics for Tuning of Glycosidase Inhibition: Design, Synthesis and Biological Evaluation of Bicyclic Pyrrolidotriazole Iminosugars.**

Inderpreet Arora<sup>a</sup> Sandeep K. Sharma<sup>b</sup> and Arun K. Shaw.<sup>a,\*</sup>

<sup>a</sup>Division of Medicinal and Process Chemistry  
CSIR-Central Drug Research Institute,  
BS-10/1, Sector 10, Jankipuram Extension, Sitapur Road,  
Lucknow 226031, India

<sup>b</sup> Microbiology Division,  
CSIR-Central Drug Research Institute,  
BS-10/1, Sector 10, Jankipuram Extension, Sitapur Road,  
Lucknow 226031, India.

[akshaw55@yahoo.com](mailto:akshaw55@yahoo.com)

| Contents                                                                                                                                                              | Page no. |
|-----------------------------------------------------------------------------------------------------------------------------------------------------------------------|----------|
| 1. Abbreviations.....                                                                                                                                                 | 2        |
| 2. NMR Spectra of compounds <b>26</b> , <b>20</b> , <b>27</b> , <b>19</b> , <b>28a-h</b> , <b>29a-h</b> , <b>30a-h</b> , <b>32</b> , <b>34</b> and <b>35-40</b> ..... | 3-42     |
| 3. General methods for glycosidase inhibition studies.....                                                                                                            | 43       |
| 4. Table S1: List of enzymes, respective substrates, buffers and optimum Incubation temperatures.....                                                                 | 43       |
| 5. Table S2. Percentage of inhibition of glycosidases by compounds <b>30a-e</b> , <b>30g</b> , <b>30h</b> and <b>37</b> at 400 $\mu$ M.....                           | 44       |
| 6. Table S3. Percentage of inhibition of glycosidases by compounds <b>30a-e</b> , <b>30g</b> , <b>30h</b> and <b>37</b> at 1000 $\mu$ M.....                          | 45       |
| 7. Michaelis-Menten plot of Activity <i>versus</i> Substrate concentration for inhibition of various enzymes.....                                                     | 46-50    |
| 8. References.....                                                                                                                                                    | 50       |

## Abbreviations

|                    |                            |
|--------------------|----------------------------|
| Bn                 | Benzyl                     |
| DCM                | Dichloromethane            |
| DMF                | Dimethylformamide          |
| EtOAc              | Ethyl acetate              |
| EtOH               | Ethanol                    |
| Et <sub>2</sub> NH | Diethylamine               |
| eq                 | Molar equivalent(s)        |
| MeOH               | Methanol                   |
| mmol               | millimoles                 |
| NMR                | Nuclear magnetic resonance |
| THF                | Tetrahydrofuran            |
| TLC                | Thin Layer chromatogram    |

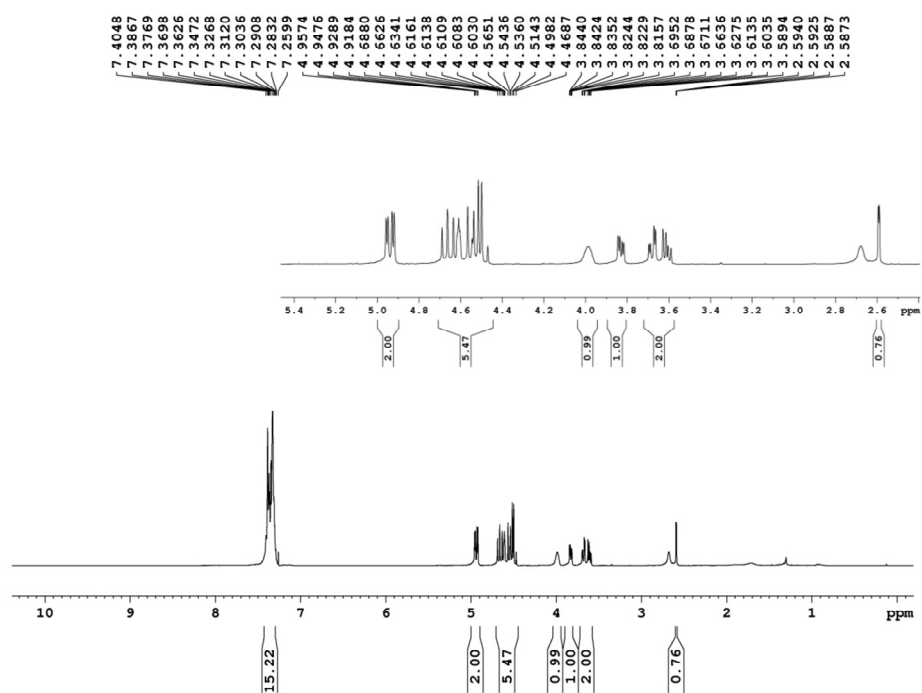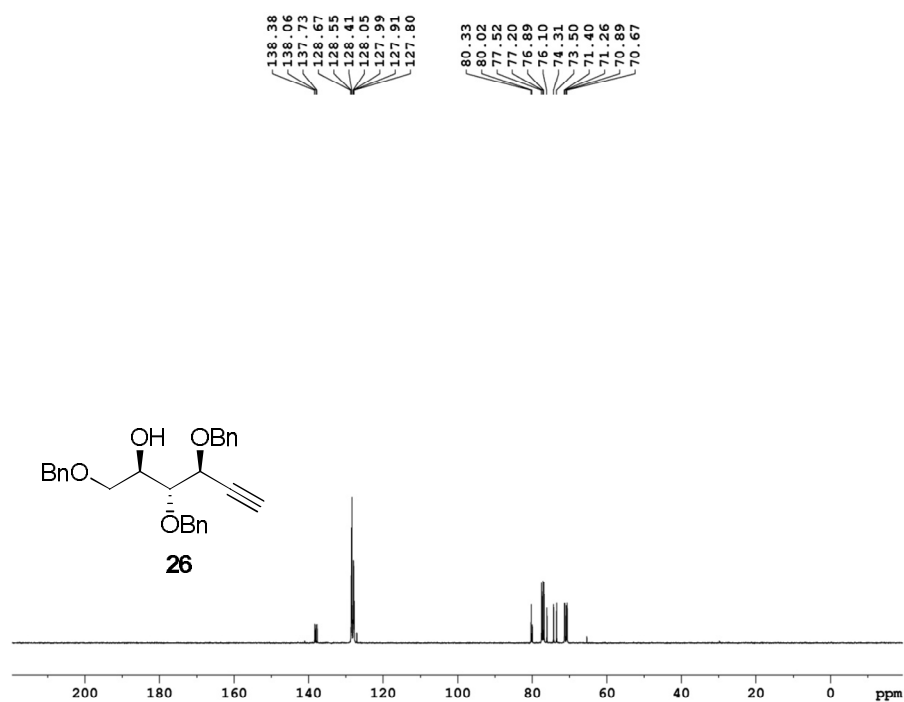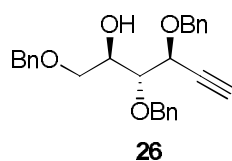

**<sup>1</sup>H and <sup>13</sup>C NMR Spectrum of 26**

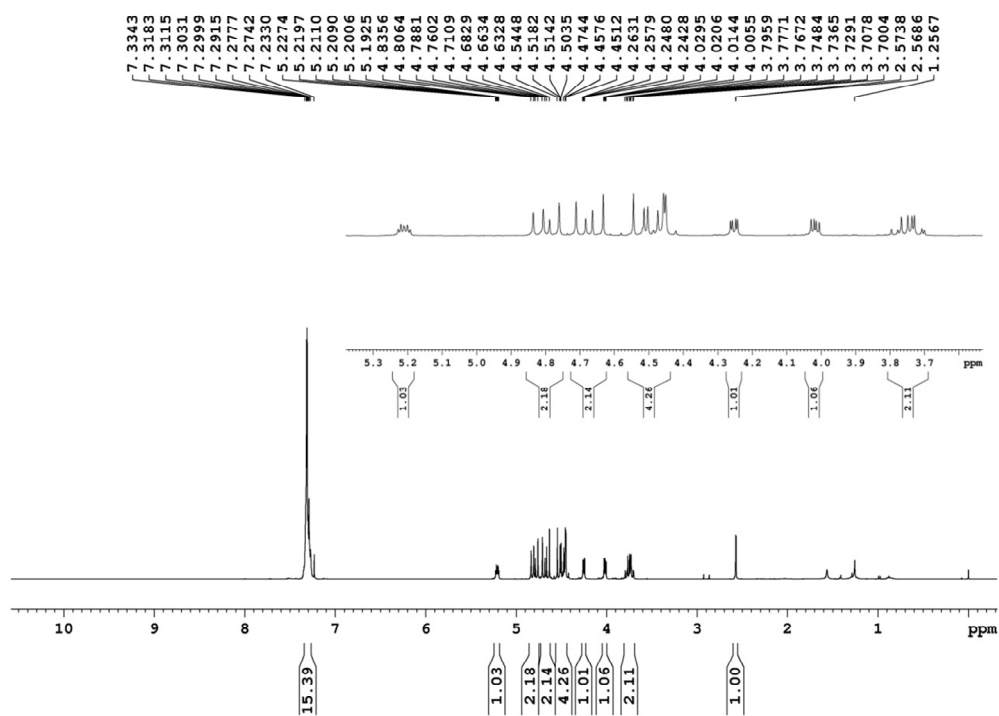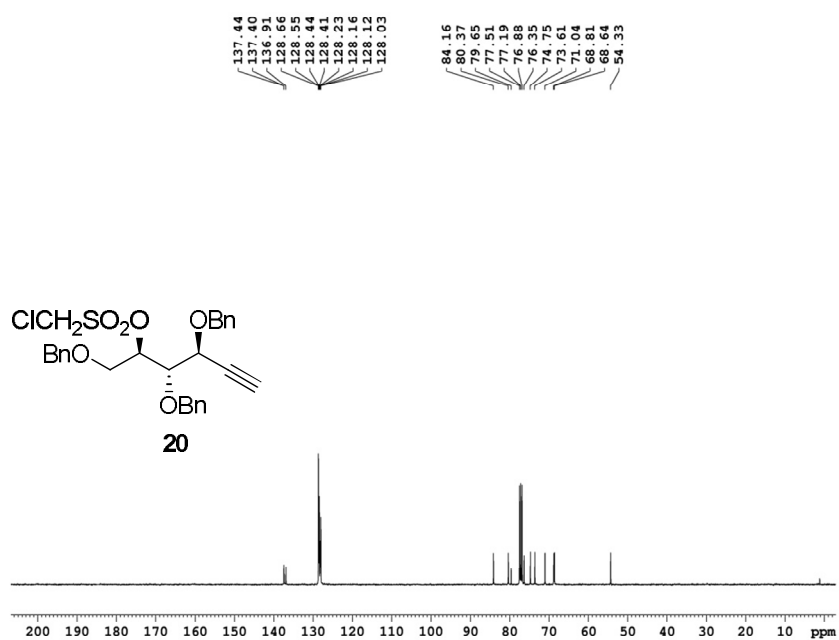

**<sup>1</sup>H and <sup>13</sup>C NMR Spectrum of 20**



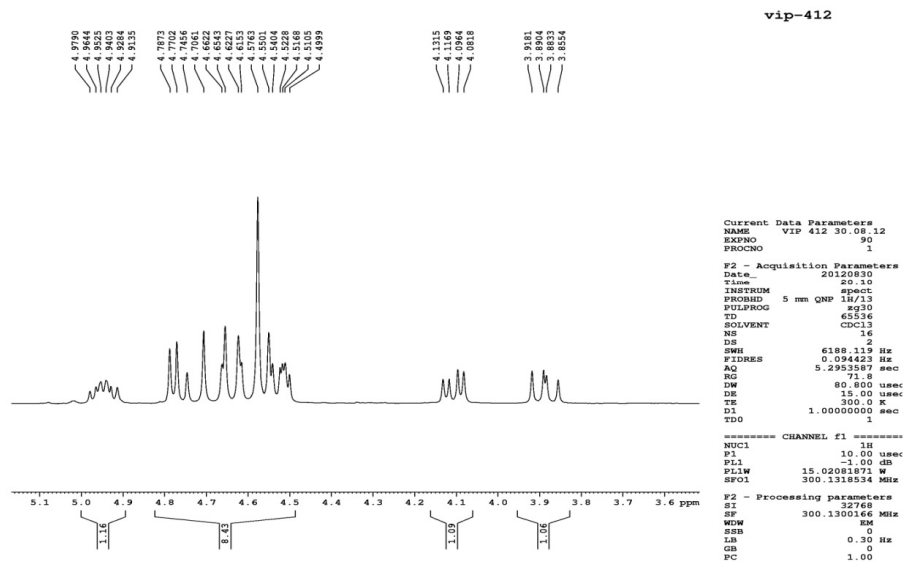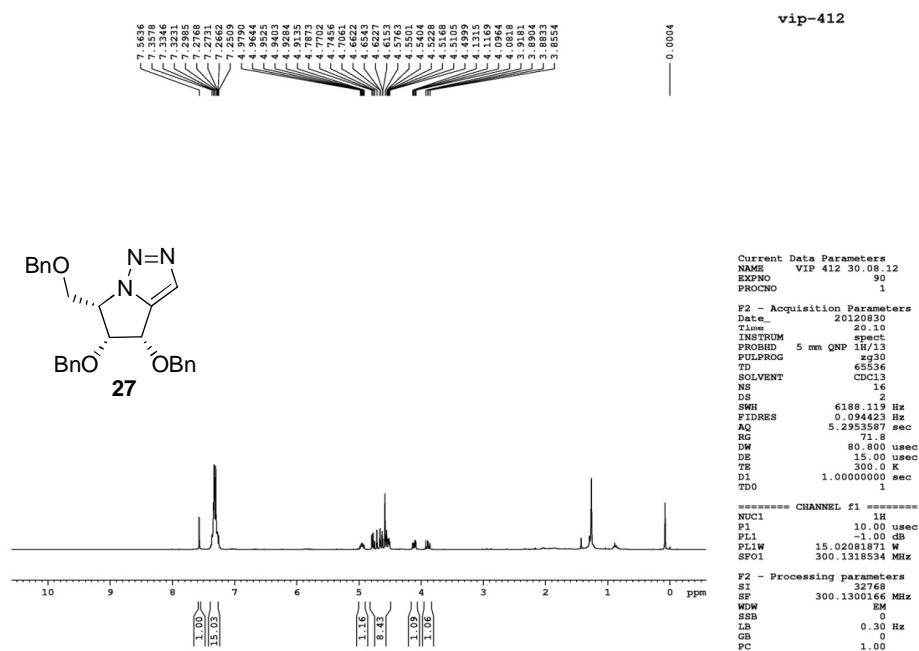

**<sup>1</sup>H NMR Spectrum of 27**

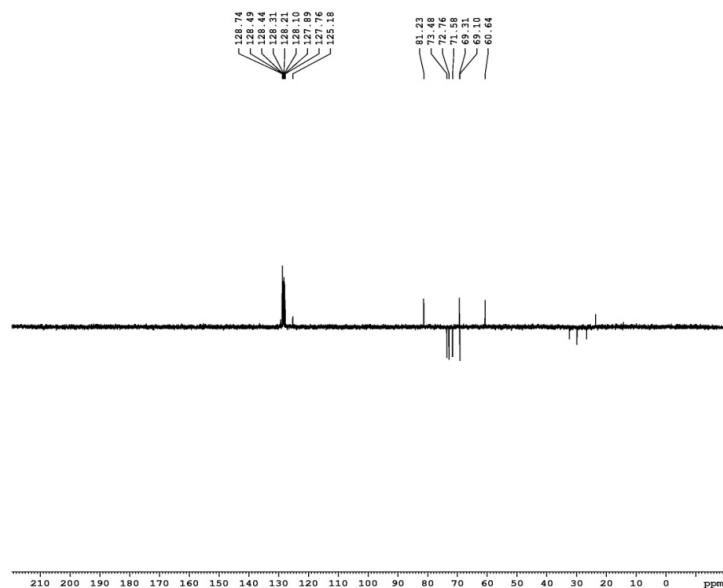

VIP-412

Current Data Parameters  
NAME VIP 412 15.06.  
EXPNO 211  
PROCNO 1

F2 - Acquisition Parameters  
Date\_ 20120616  
Time 0.14  
INSTRUM spect  
PROBHD 5 mm QNP 1H/13  
PULPROG zgpg30  
TD 65536  
SOLVENT CDCl3  
NS 256  
DS 4  
SWH 18028.846  
FIDRES 0.275098  
AQ 1.8175818  
RG 2050  
DW 27.733  
DE 6.00  
TE 303.0  
CNST2 145.0000000  
D1 2.00000000  
d2 0.00344828  
d12 0.00002000  
DELTA 0.00001108  
TDO 1

===== CHANNEL f1 =====  
NUC1 13C  
P1 8.70  
p2 17.40  
PL1 -3.00  
SFO1 75.4752953

===== CHANNEL f2 =====  
CPDPRG2 waltz16

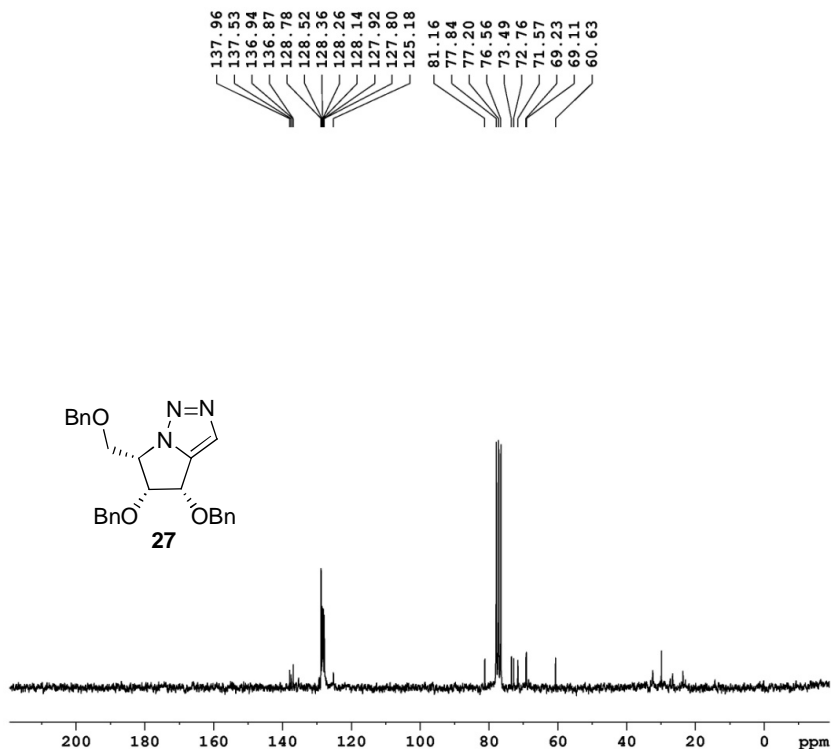

Current Data Parameters  
NAME VIP 412 22.06.12  
EXPNO 200  
PROCNO 1

F2 - Acquisition Parameters  
Date\_ 20121221  
Time 12.52  
INSTRUM spect  
PROBHD 5 mm Dual 13C/  
PULPROG zgpg30  
TD 65536  
SOLVENT CDCl3  
NS 664  
DS 4  
SWH 11990.407 Hz  
FIDRES 0.182959 Hz  
AQ 2.732611 sec  
RG 80.6  
DW 41.700 usec  
DE 6.00 usec  
TE 0.0 K  
D1 2.00000000 sec  
d11 0.03000000 sec  
DELTA 1.89999998 sec  
MCREST 0.00000000 sec  
MCNCR 0.01500000 sec

===== CHANNEL f1 =====  
NUC1 13C  
P1 6.30 usec  
PL1 -6.00 dB  
SFO1 50.3277608 MHz

===== CHANNEL f2 =====  
CPDPRG2 waltz16  
NUC2 1H  
PCPD2 100.00 usec  
PL2 -4.00 dB  
PL12 18.00 dB  
PL13 22.00 dB  
SFO2 200.1308005 MHz

F2 - Processing parameters  
SI 32768  
SF 50.327205 MHz  
WDW EM  
SSB 0  
LB 3.00 Hz  
GB 0  
PC 1.40

<sup>13</sup>C NMR Spectrum of 27

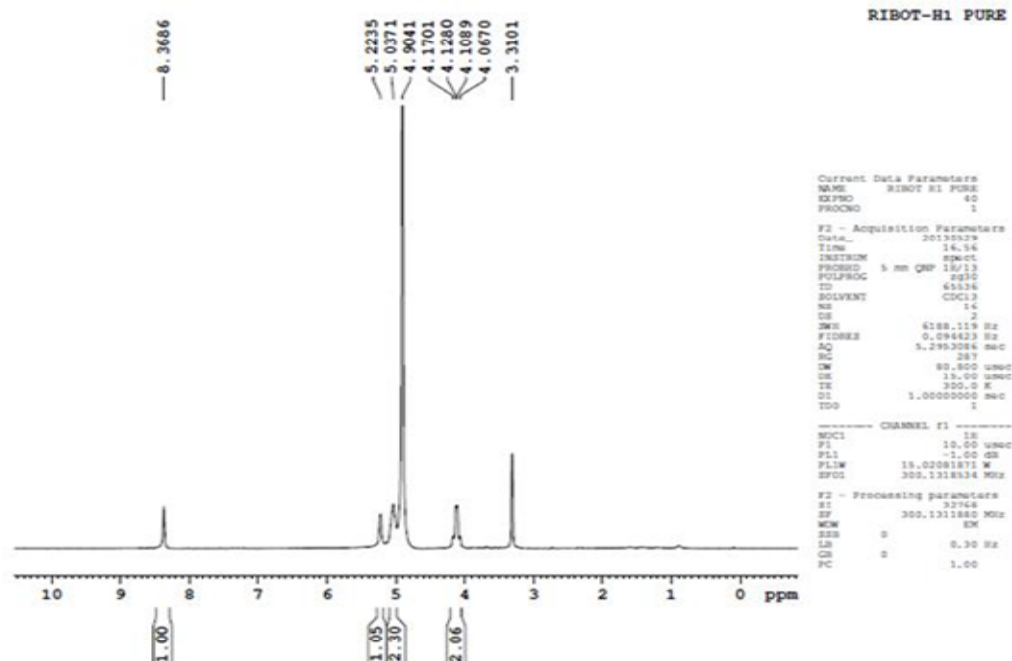

<sup>1</sup>H NMR Spectrum of 19

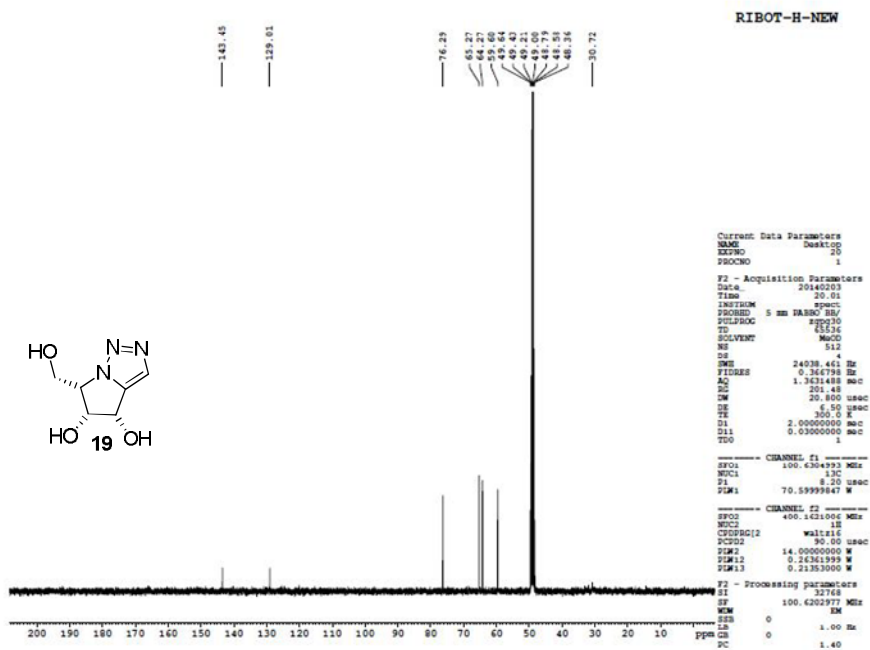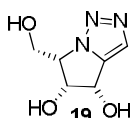

<sup>13</sup>C NMR Spectrum of 19

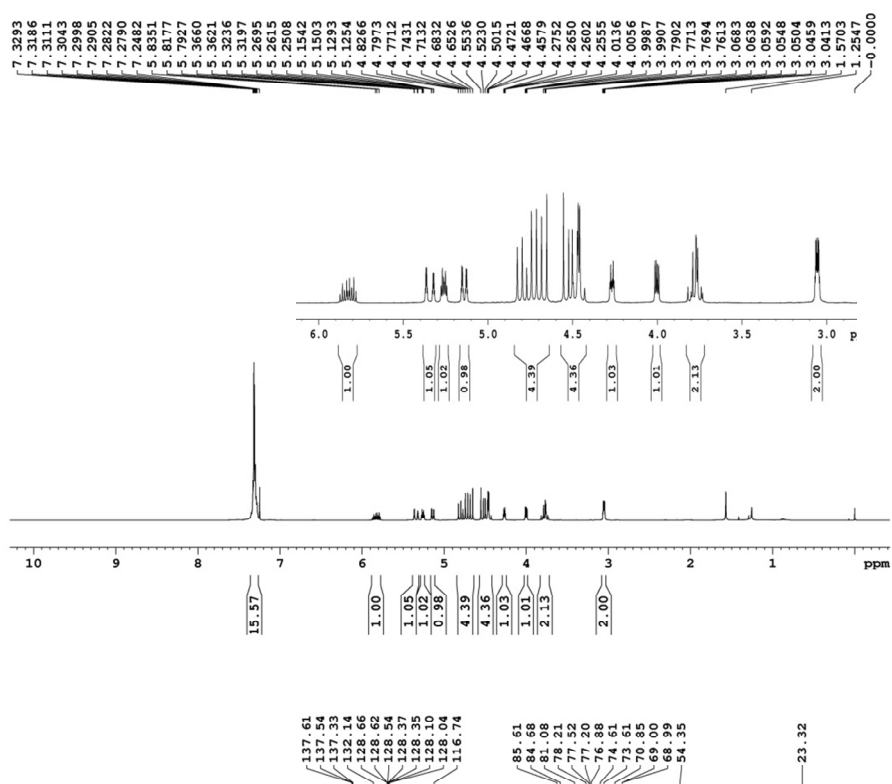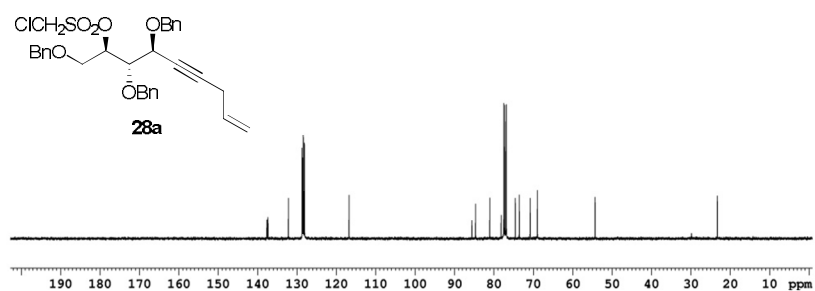

**<sup>1</sup>H and <sup>13</sup>C NMR Spectrum of 28a**

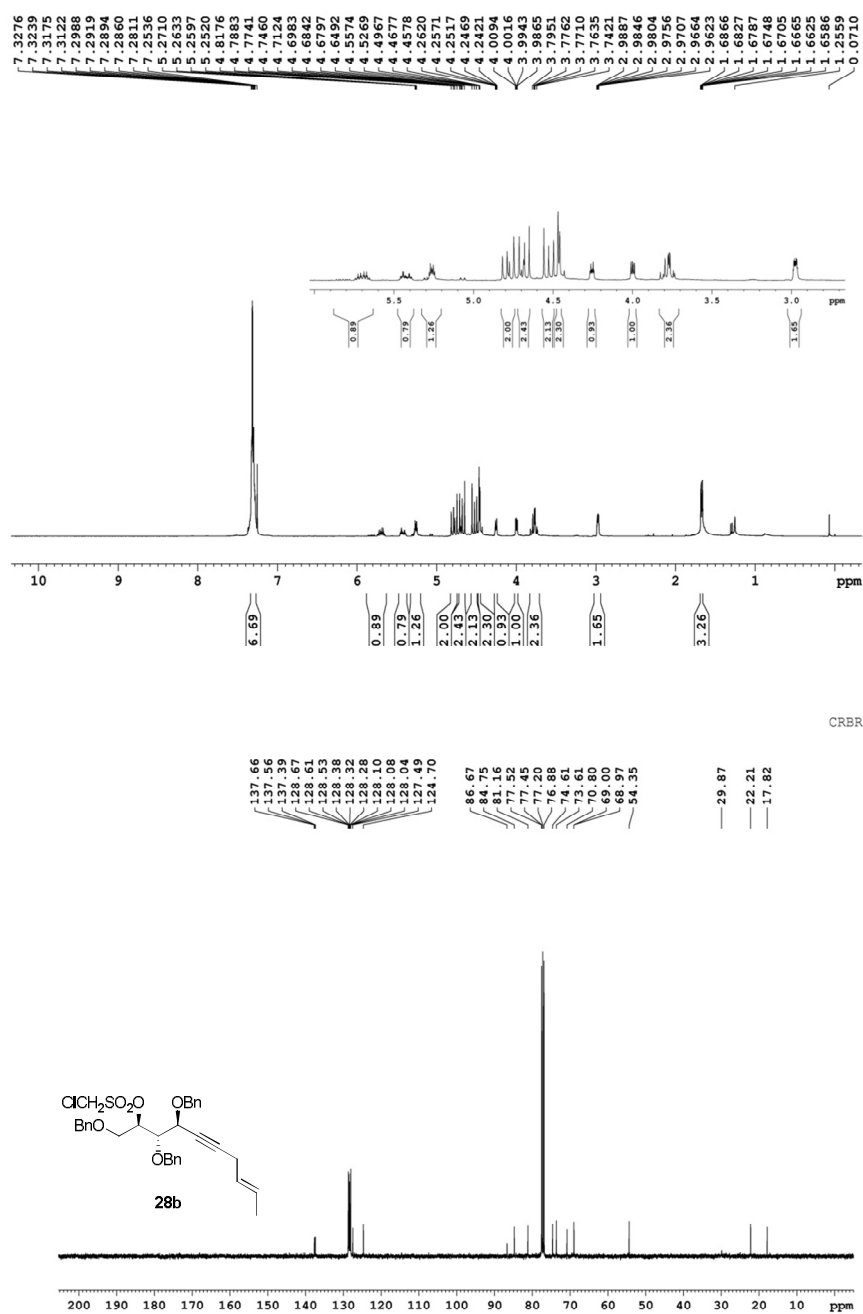

**<sup>1</sup>H and <sup>13</sup>C NMR Spectrum of 28b**

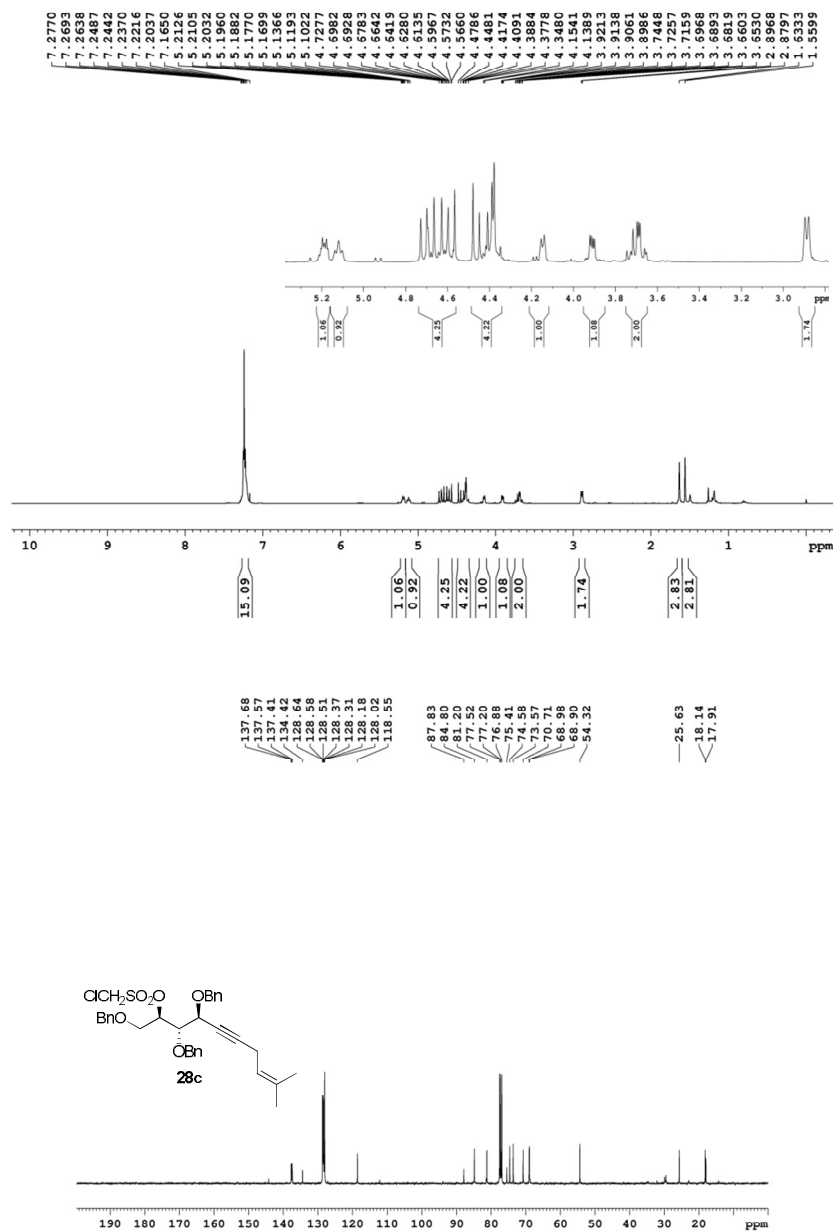

**<sup>1</sup>H and <sup>13</sup>C NMR Spectrum of 28c**

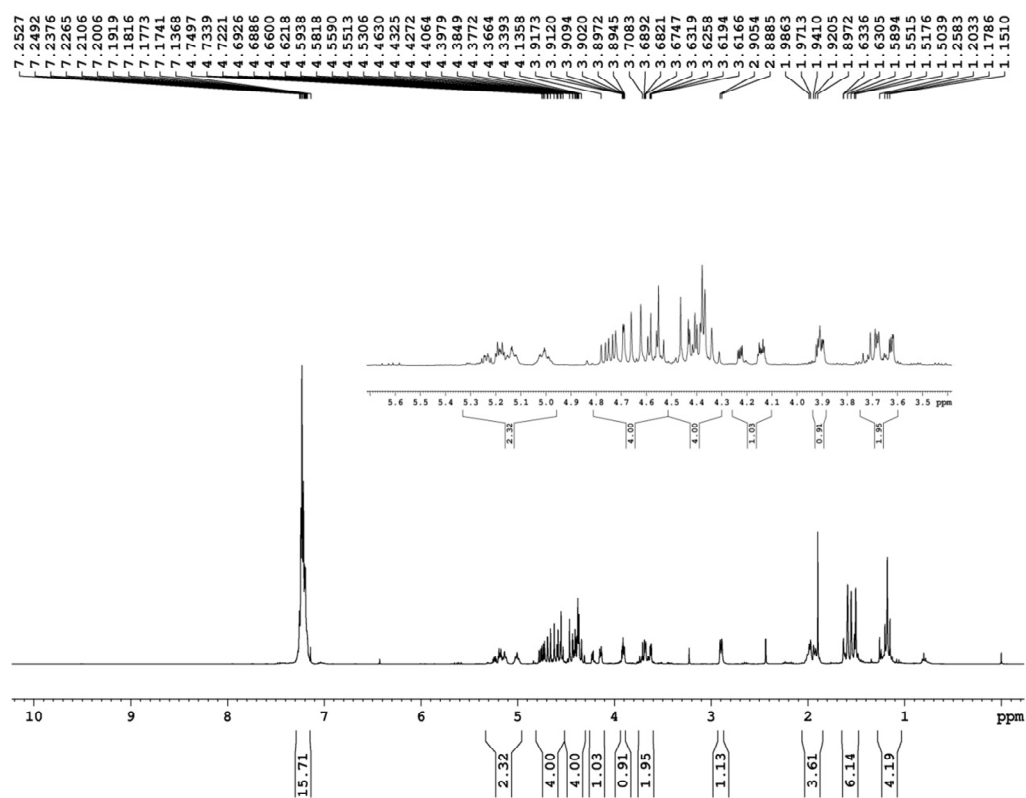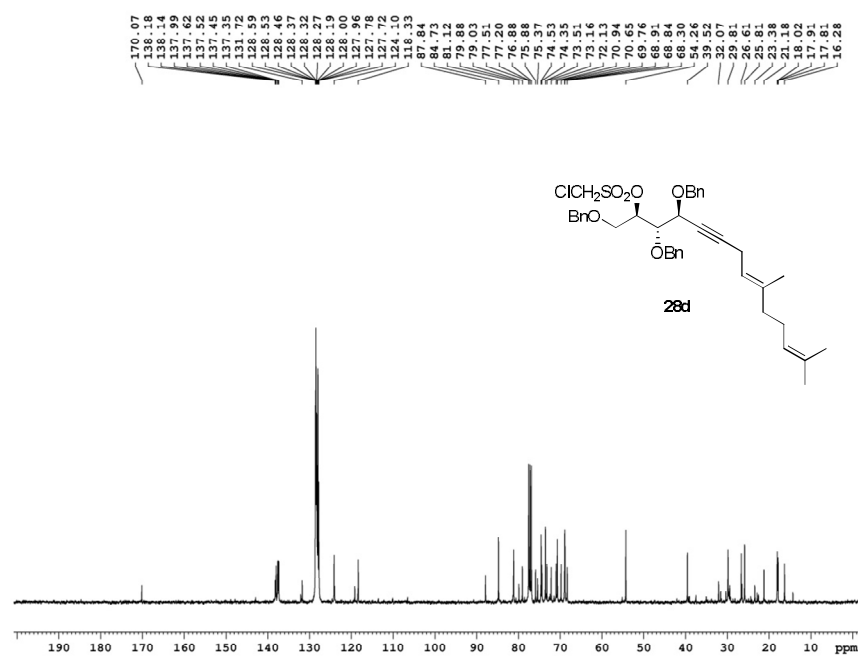

**<sup>1</sup>H and <sup>13</sup>C NMR Spectrum of 28d**





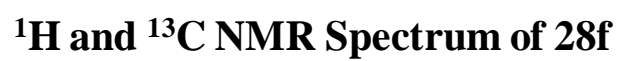

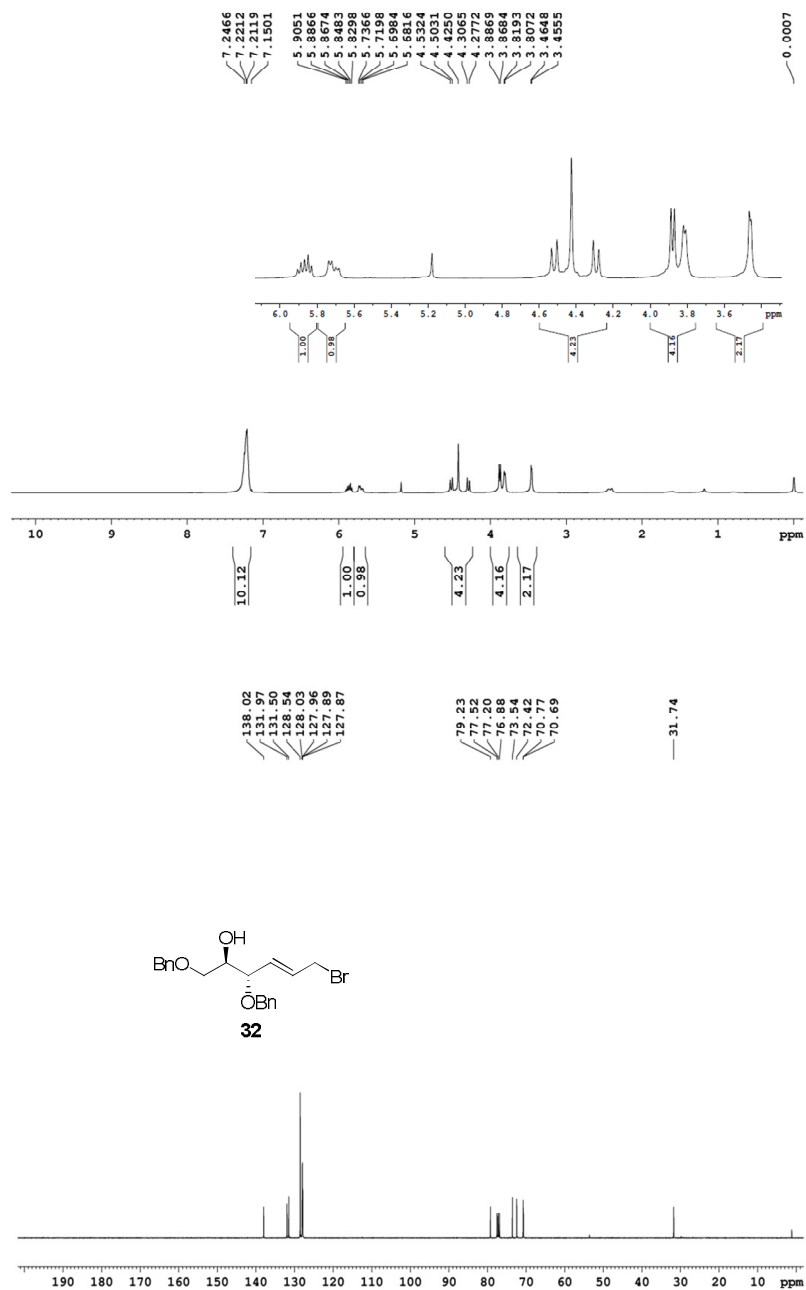



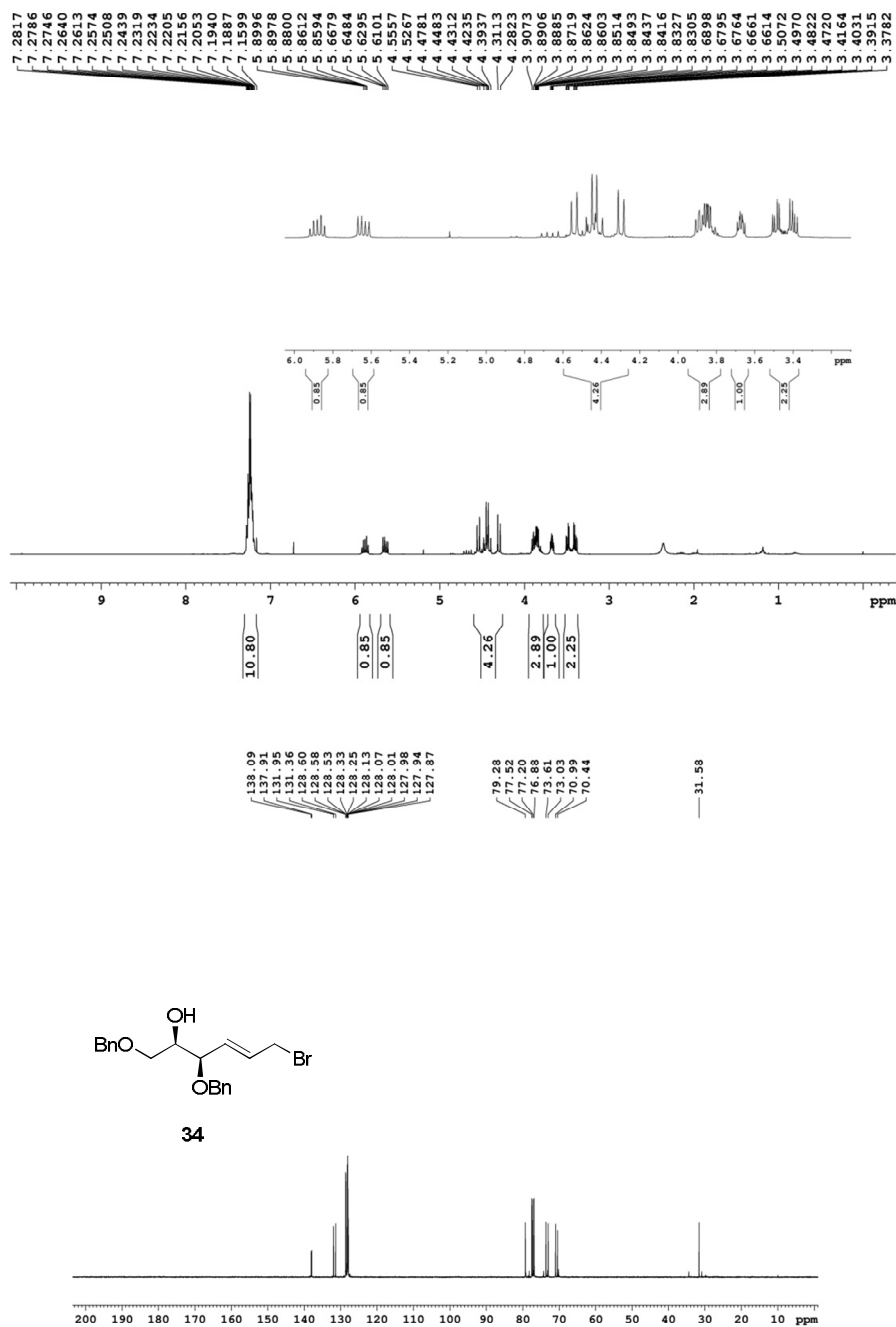

**<sup>1</sup>H and <sup>13</sup>C NMR Spectrum of 34**

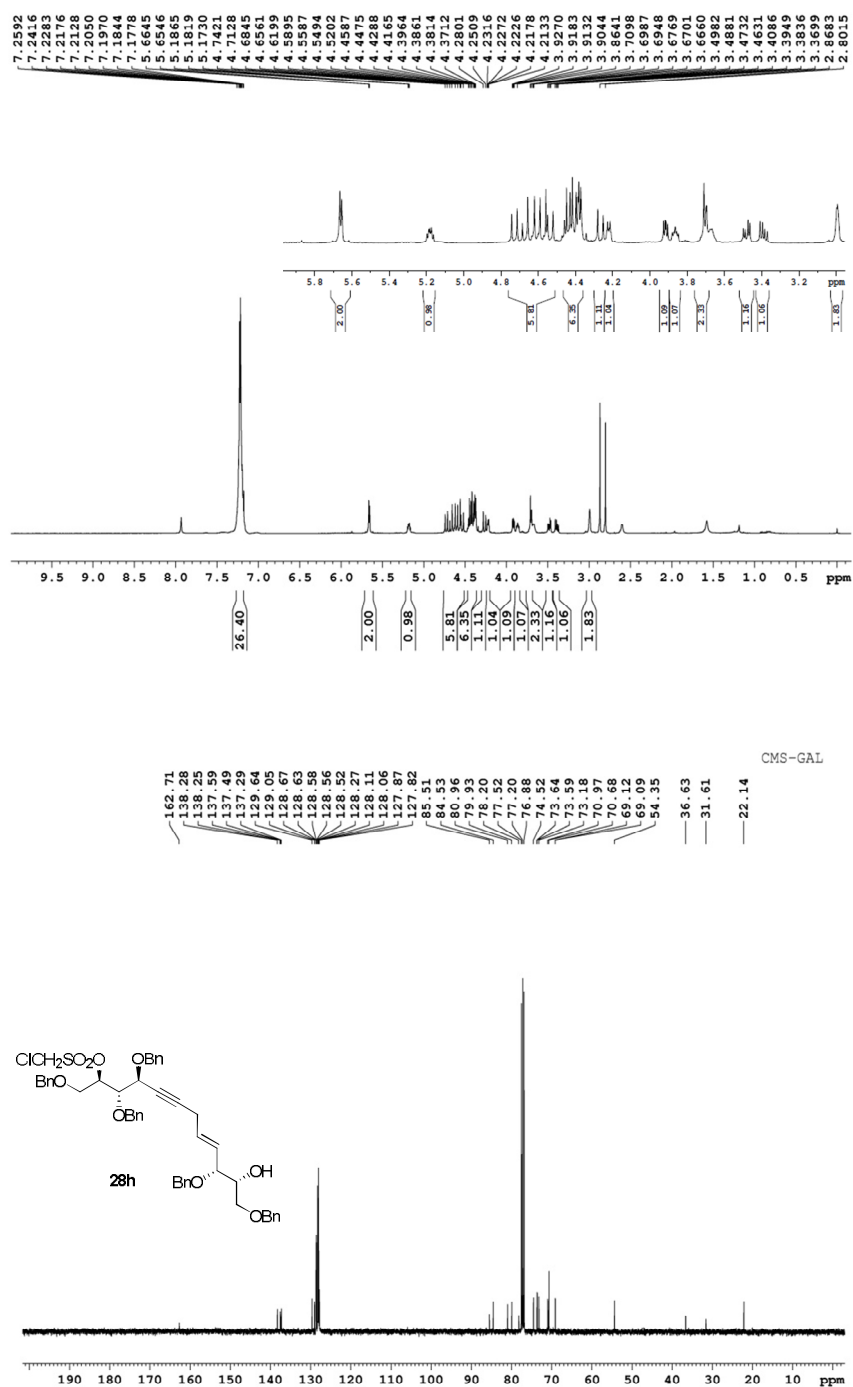

**<sup>1</sup>H and <sup>13</sup>C NMR Spectrum of 28h**

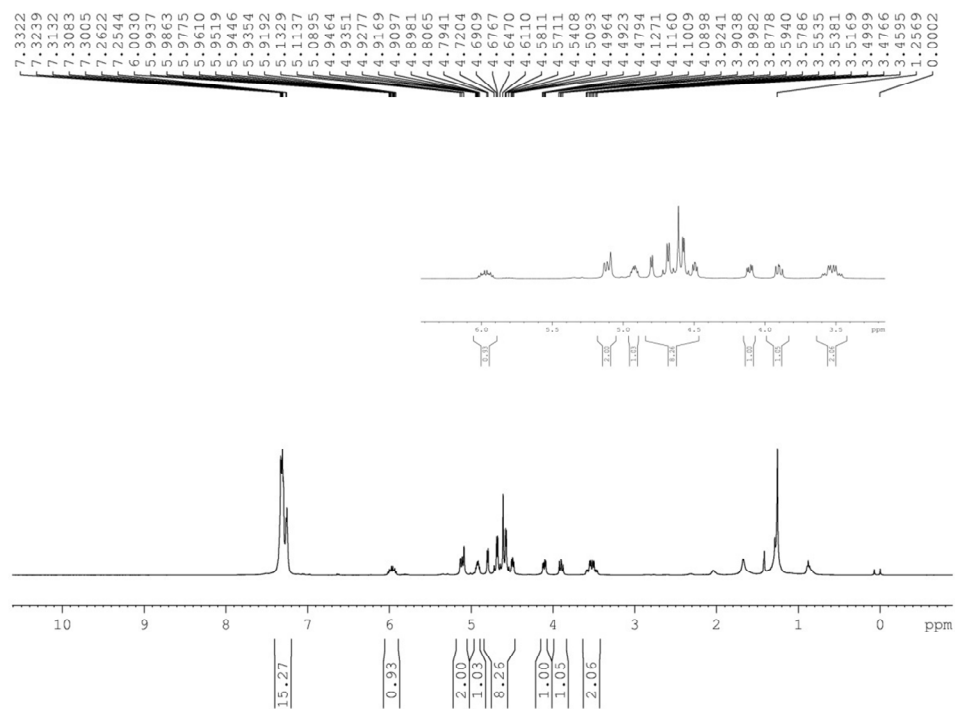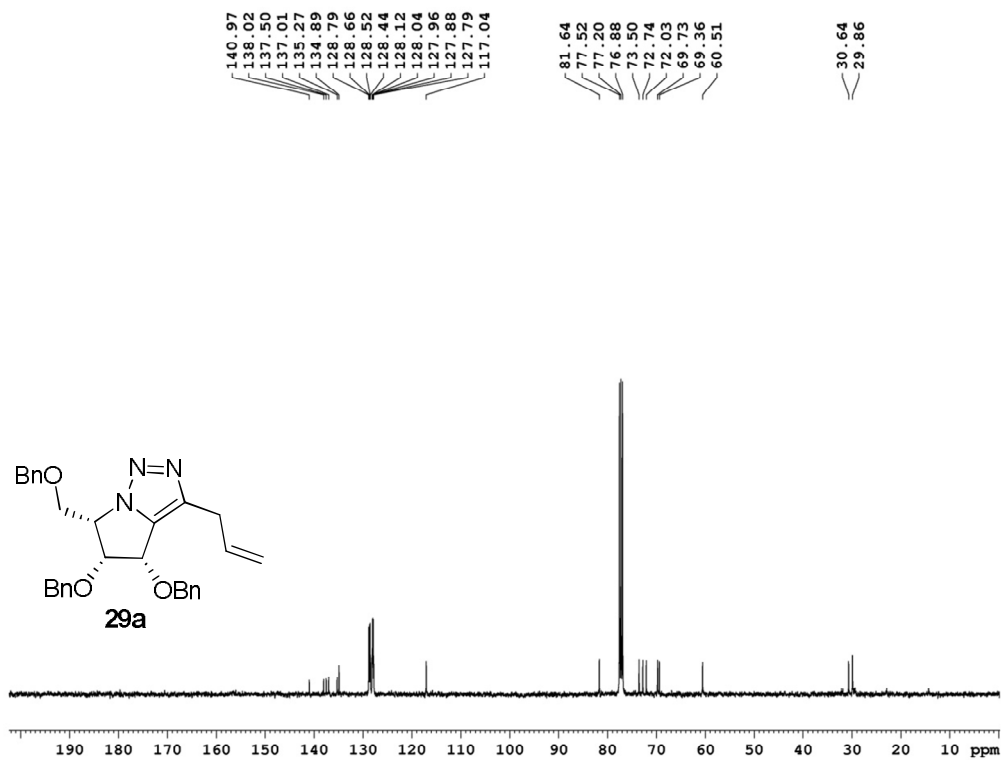

**<sup>1</sup>H and <sup>13</sup>C NMR Spectrum of 29a**

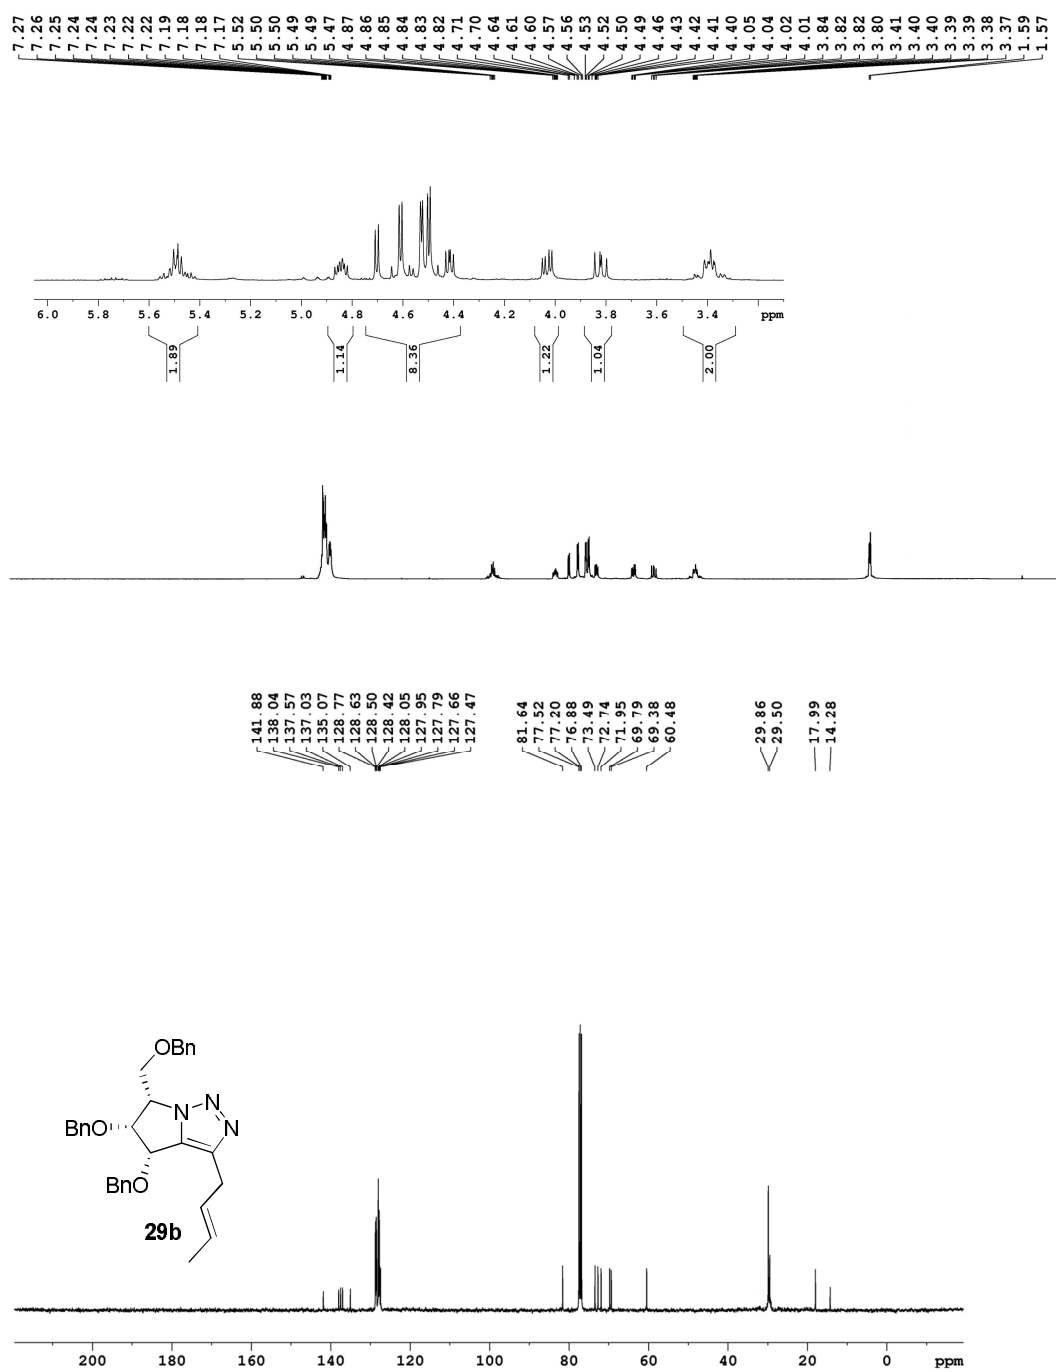

**<sup>1</sup>H and <sup>13</sup>C NMR Spectrum of 29b**

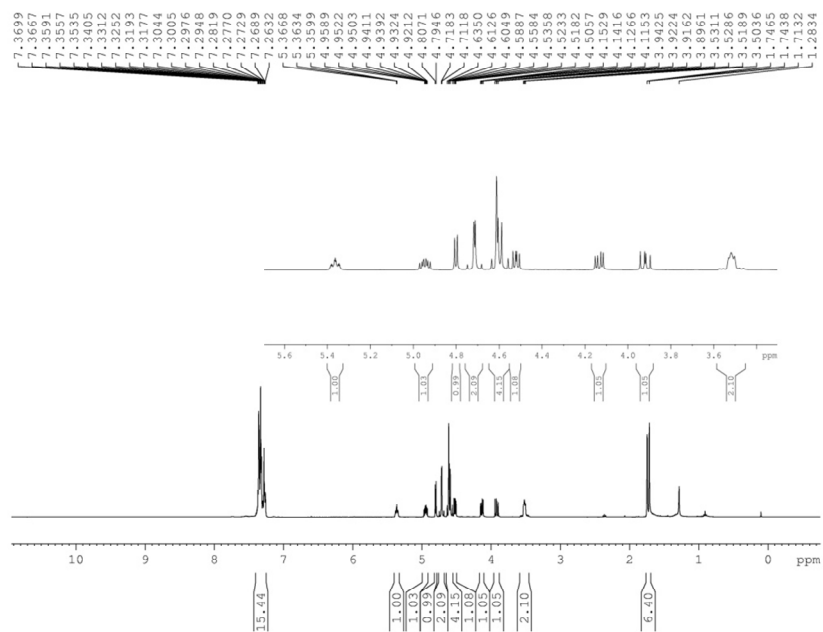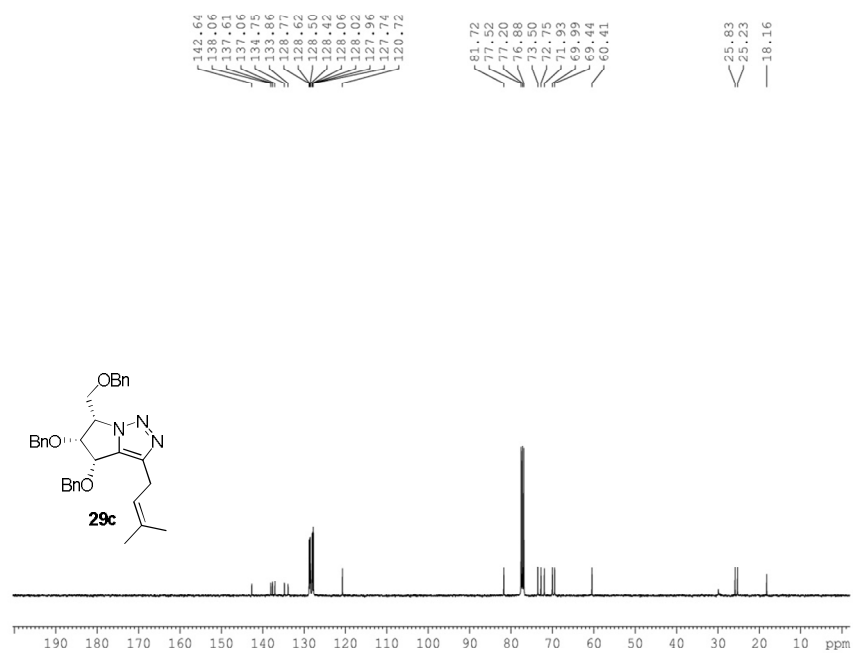

**<sup>1</sup>H and <sup>13</sup>C NMR Spectrum of 29c**



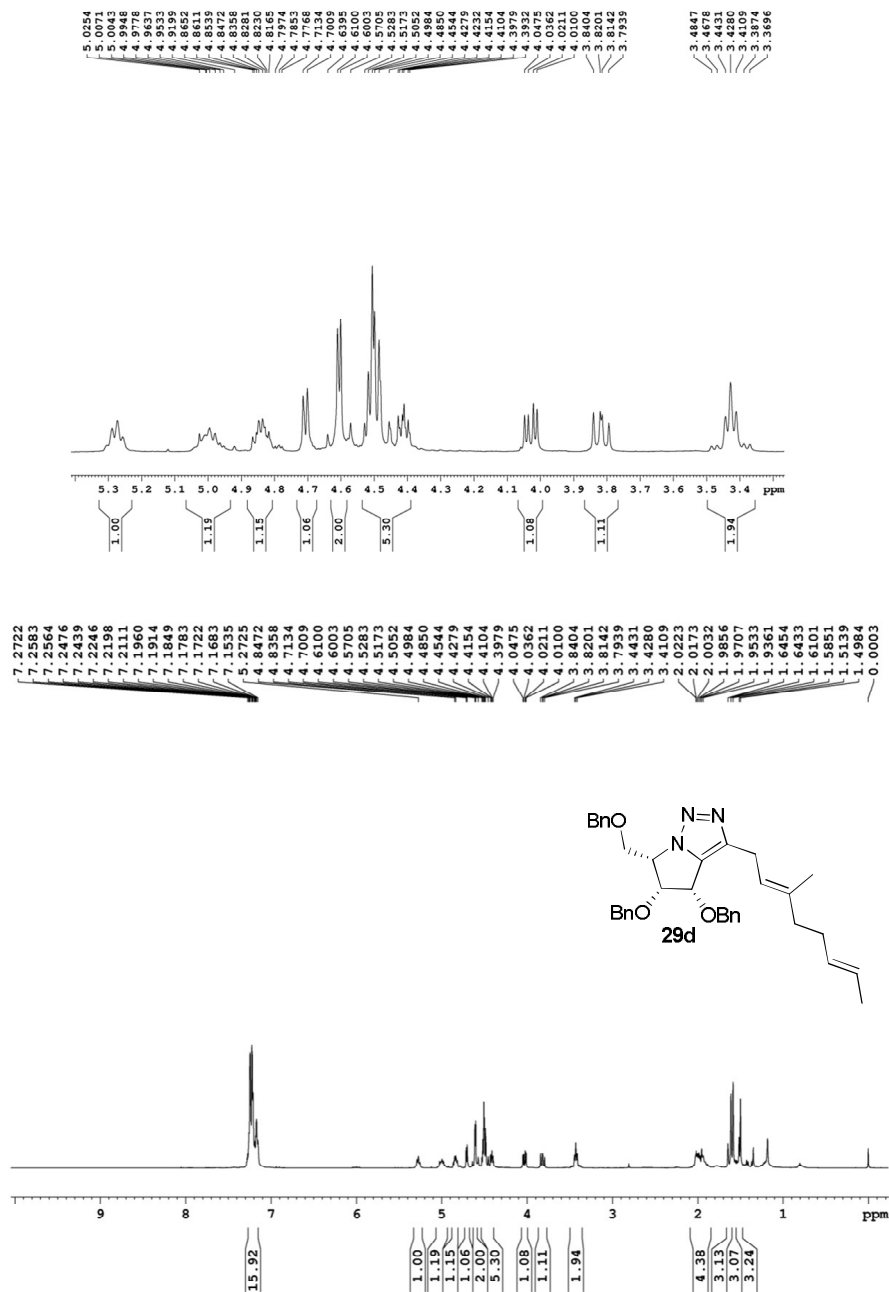

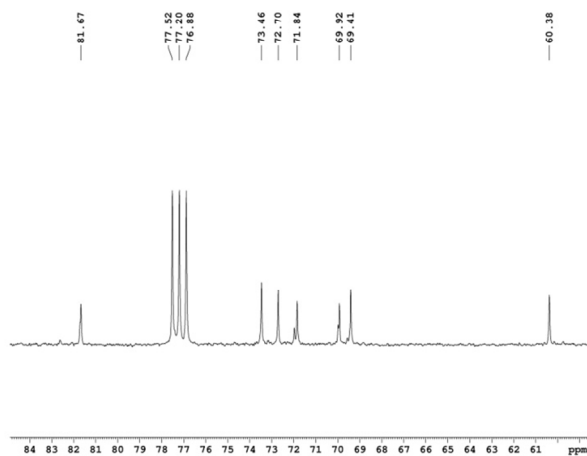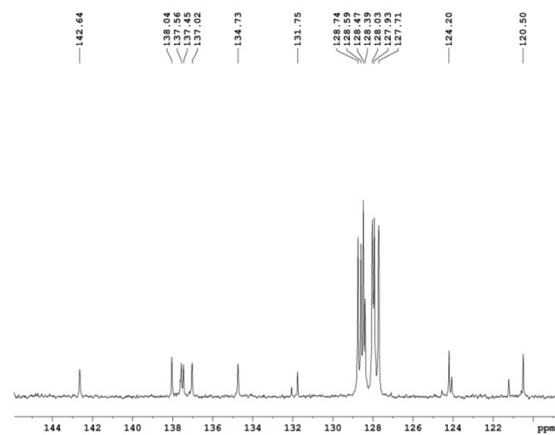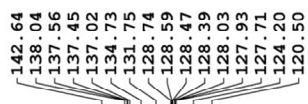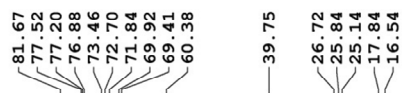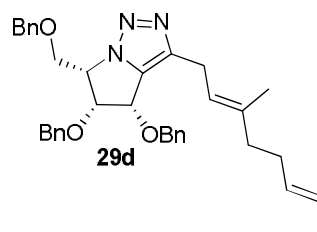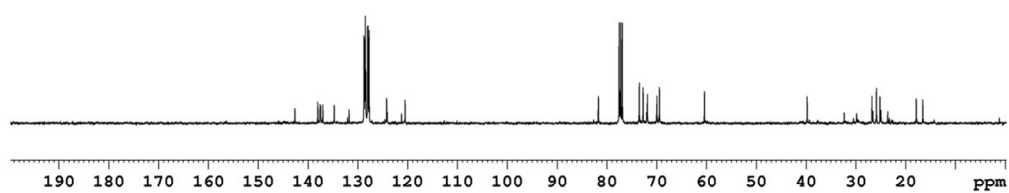

**$^{13}\text{C}$  NMR Spectrum of 29d**

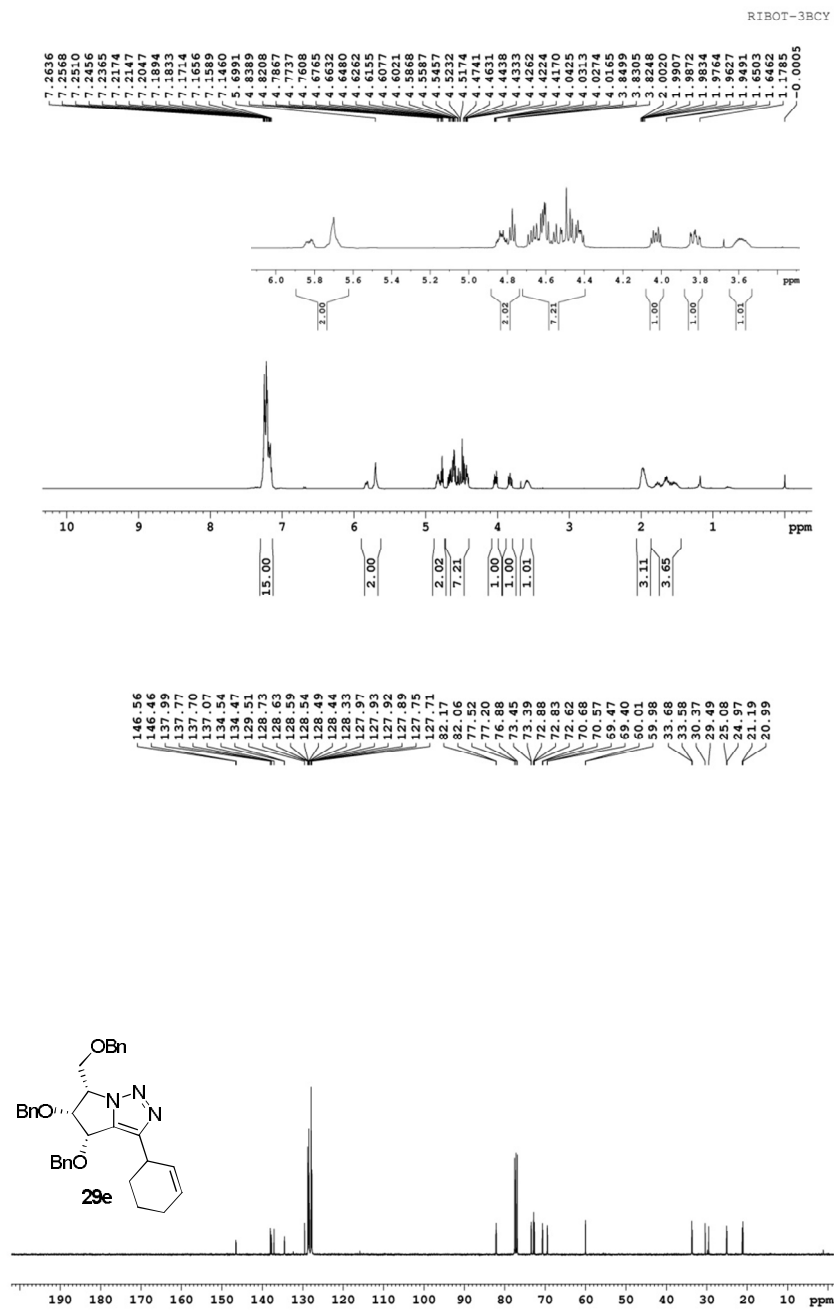

**<sup>1</sup>H and <sup>13</sup>C NMR Spectrum of 29e**

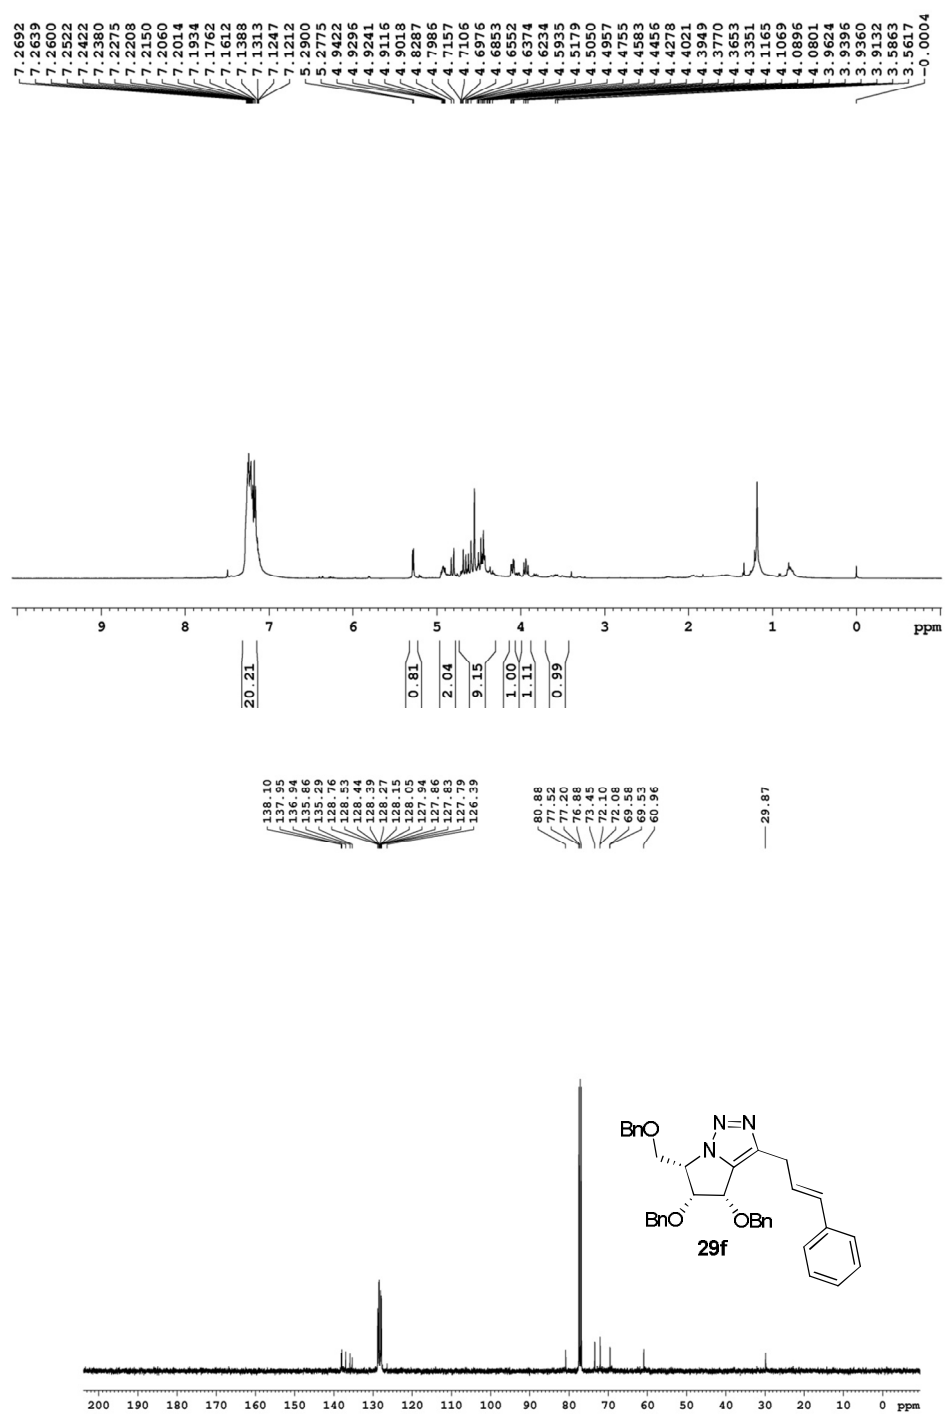

**<sup>1</sup>H and <sup>13</sup>C NMR Spectrum of 29f**

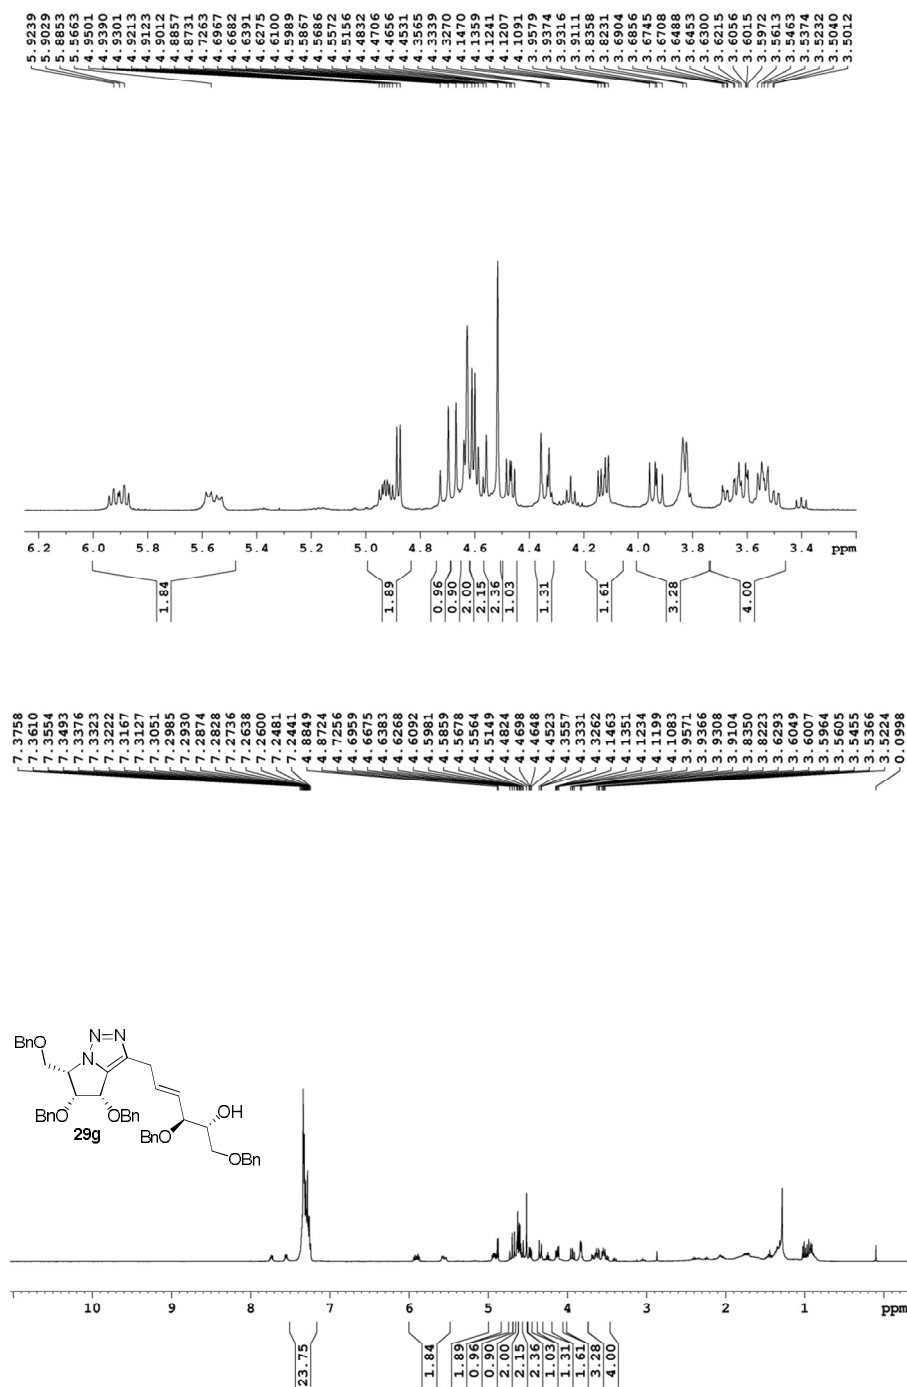

**<sup>1</sup>H NMR Spectrum of 29g**

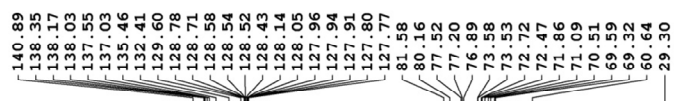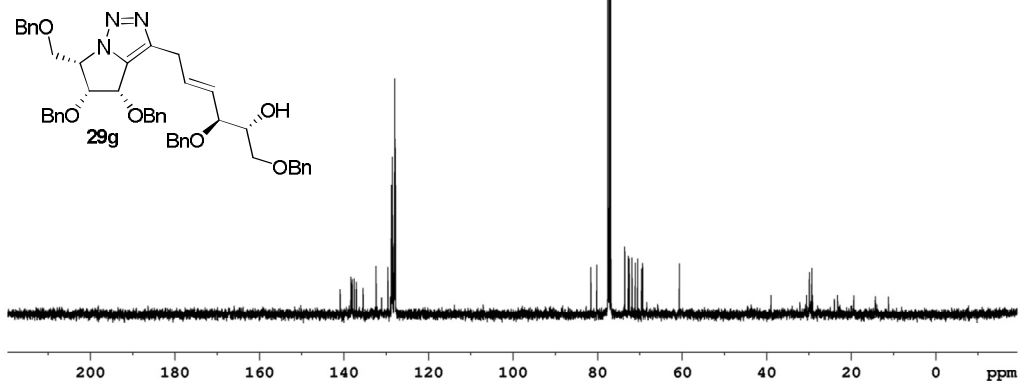

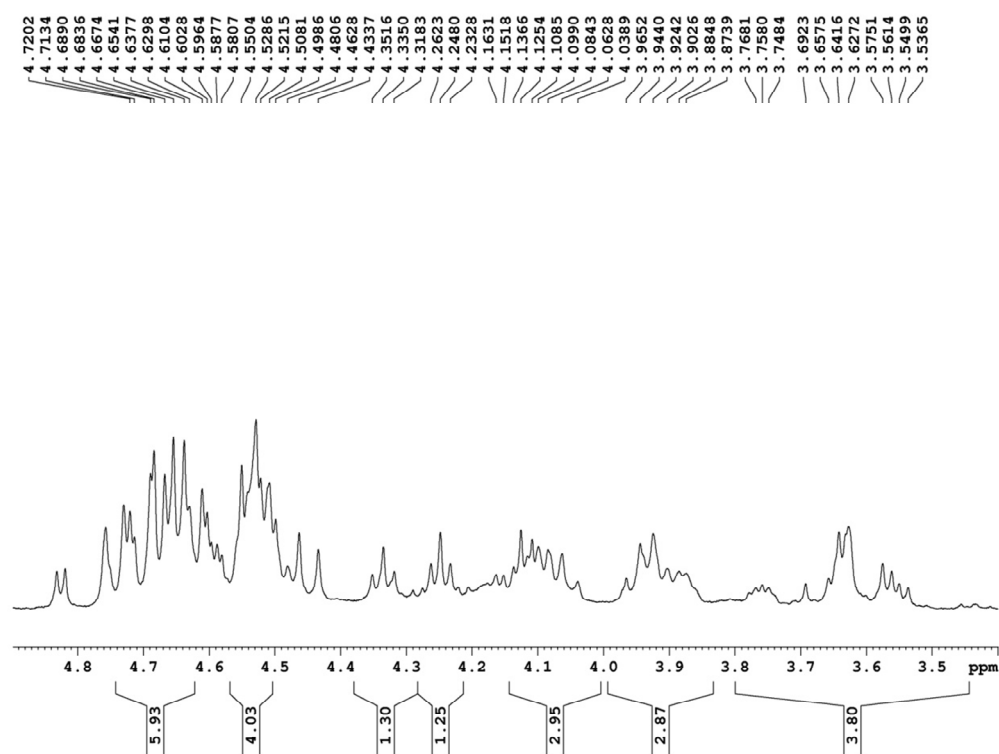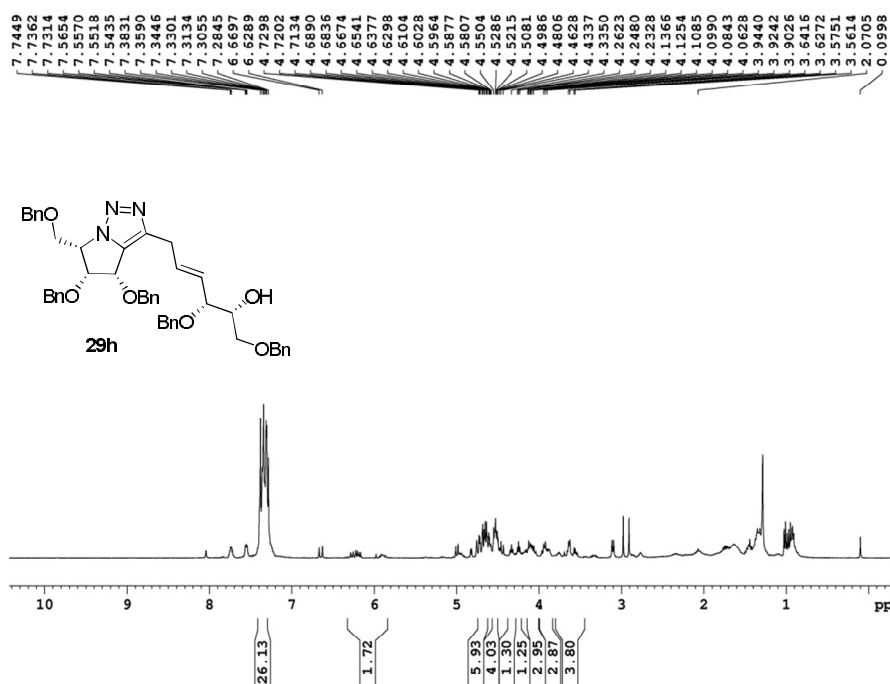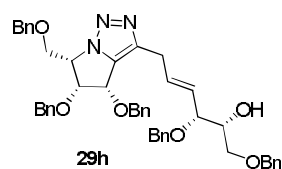

<sup>1</sup>H NMR Spectrum of 29h

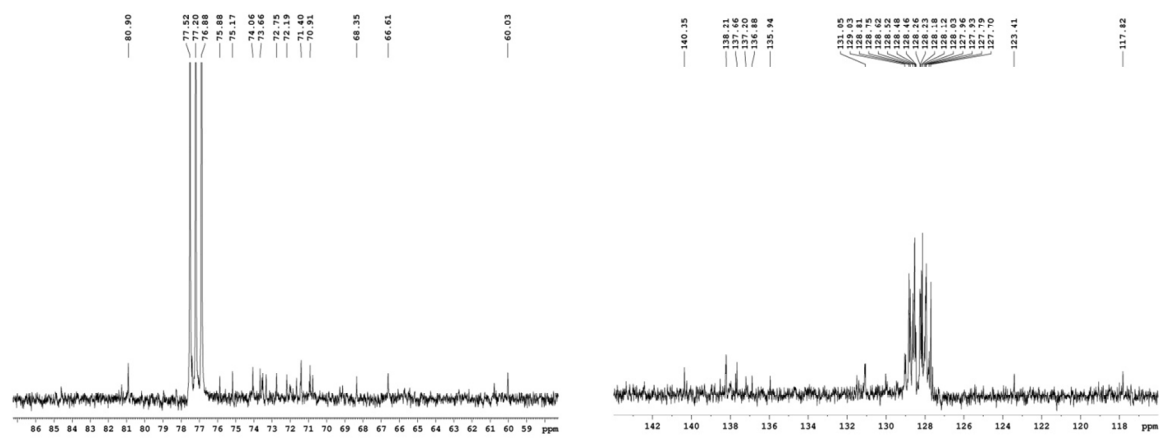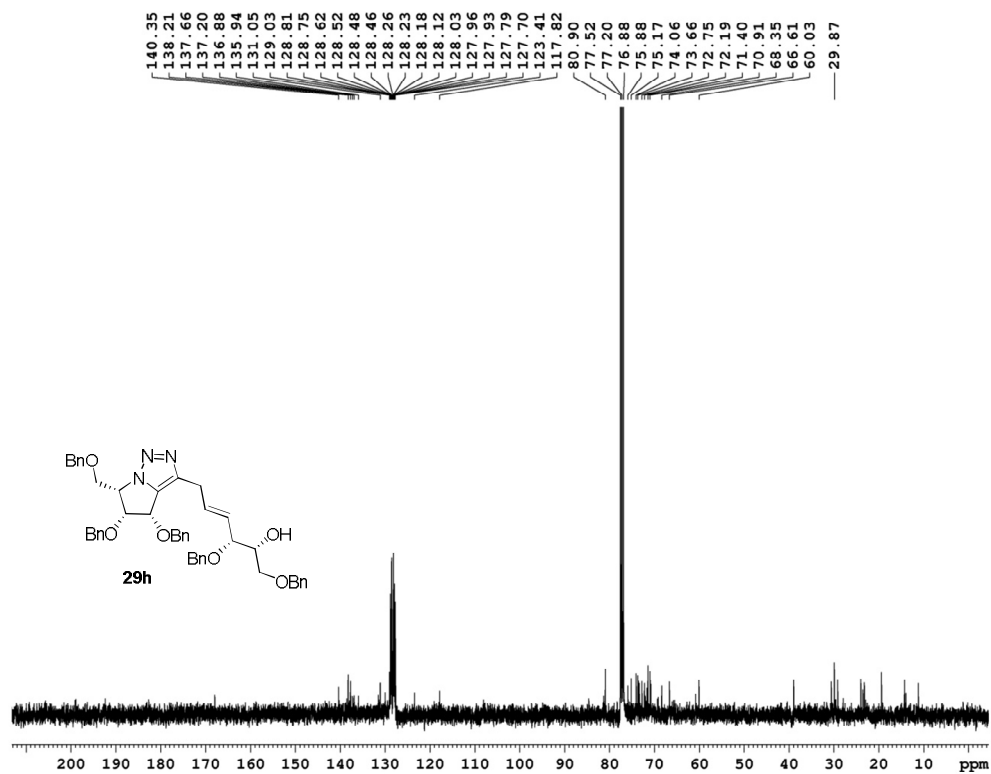

**$^{13}\text{C}$  NMR Spectrum of 29h**



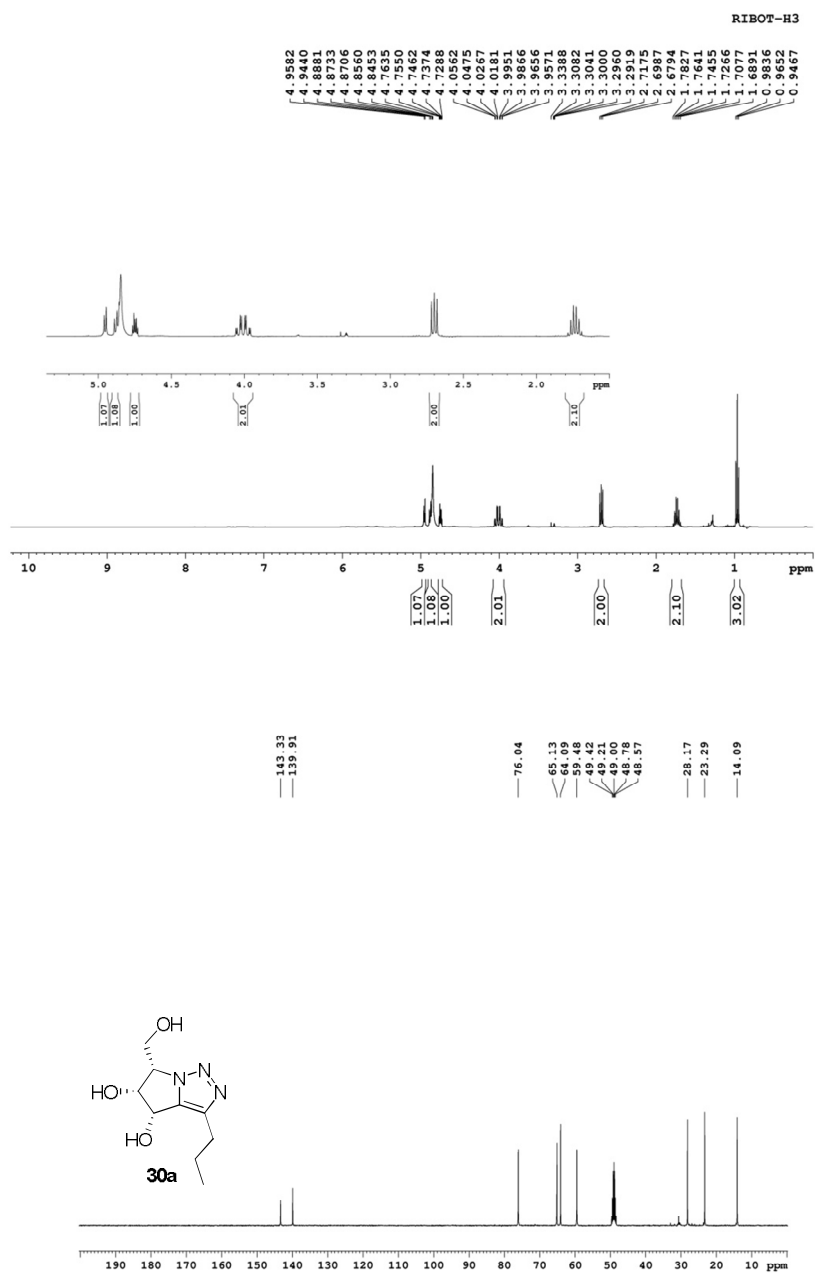

**<sup>1</sup>H and <sup>13</sup>C NMR Spectrum of 30a**

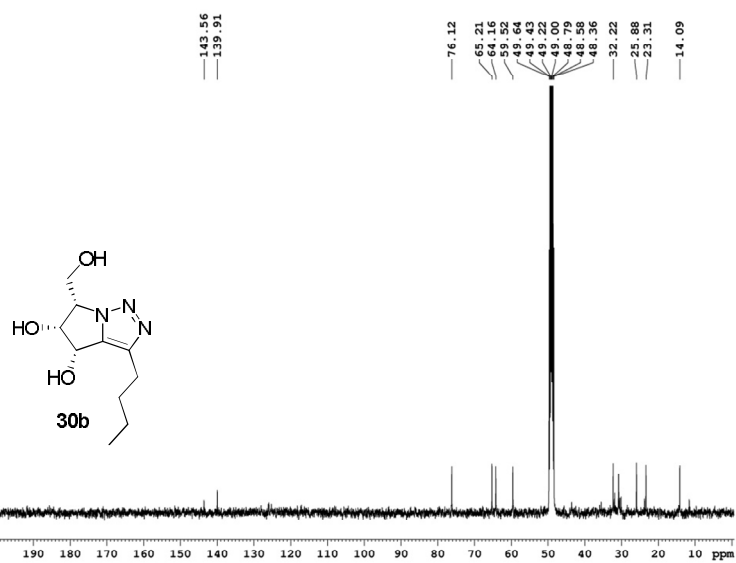



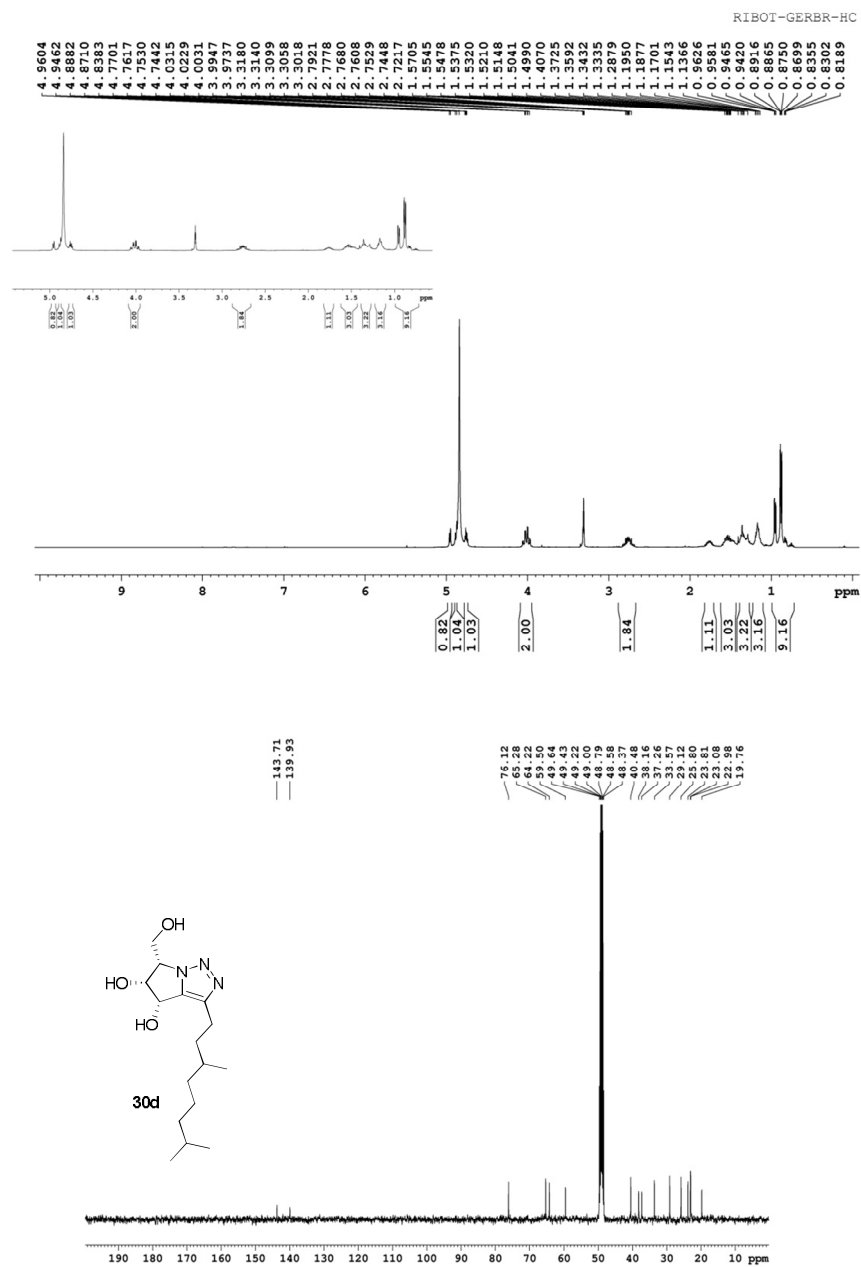

**<sup>1</sup>H and <sup>13</sup>C NMR Spectrum of 30d**

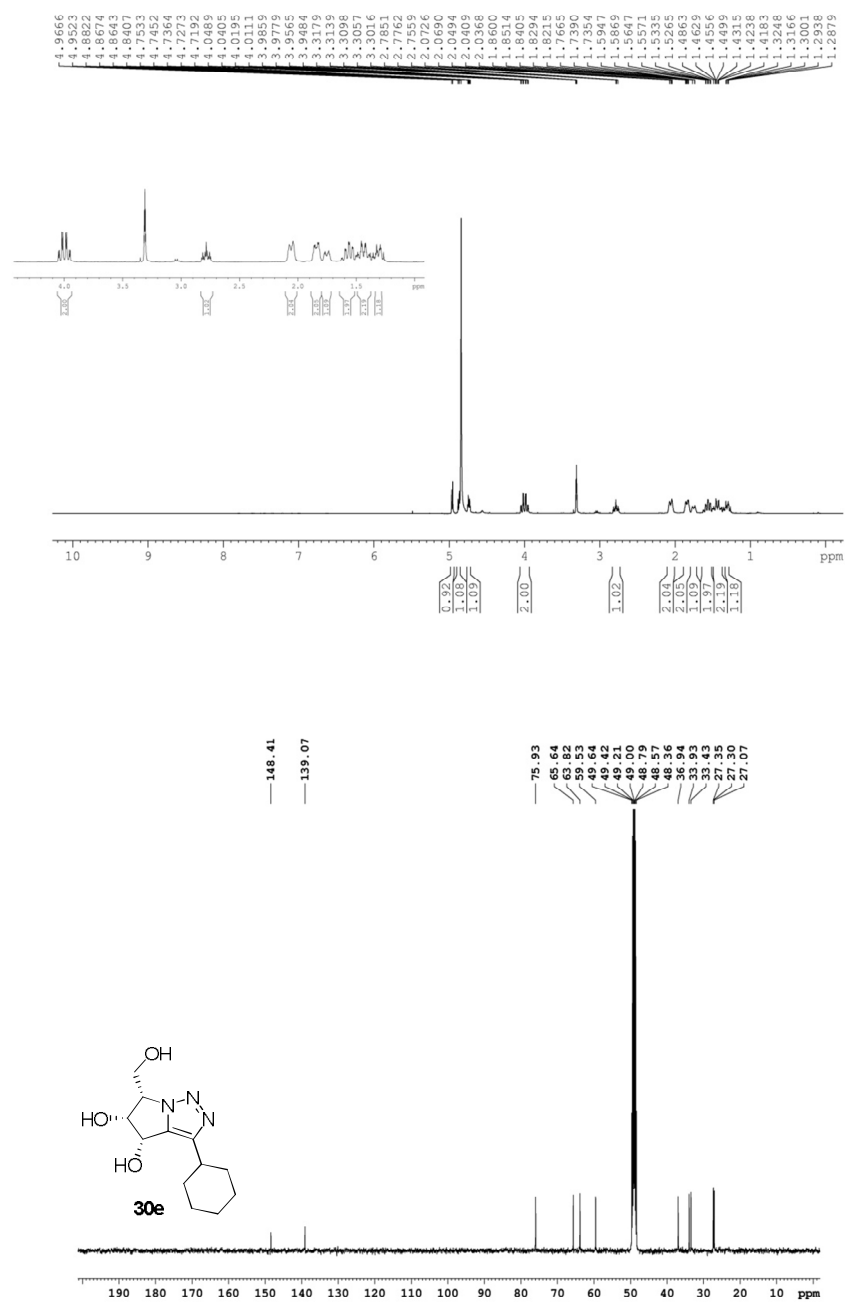

**<sup>1</sup>H and <sup>13</sup>C NMR Spectrum of 30e**

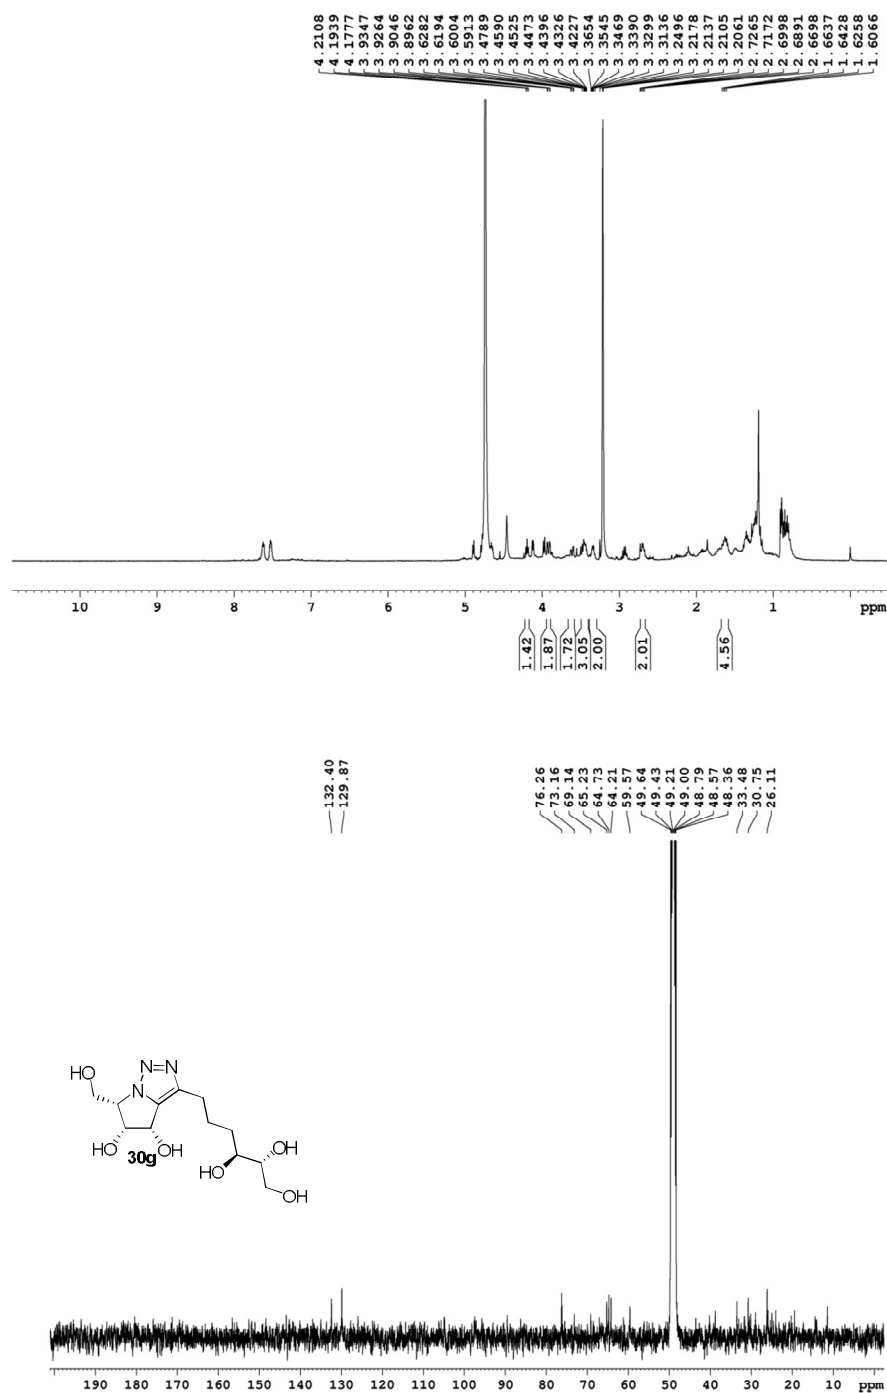

**<sup>1</sup>H and <sup>13</sup>C NMR Spectrum of 30g**

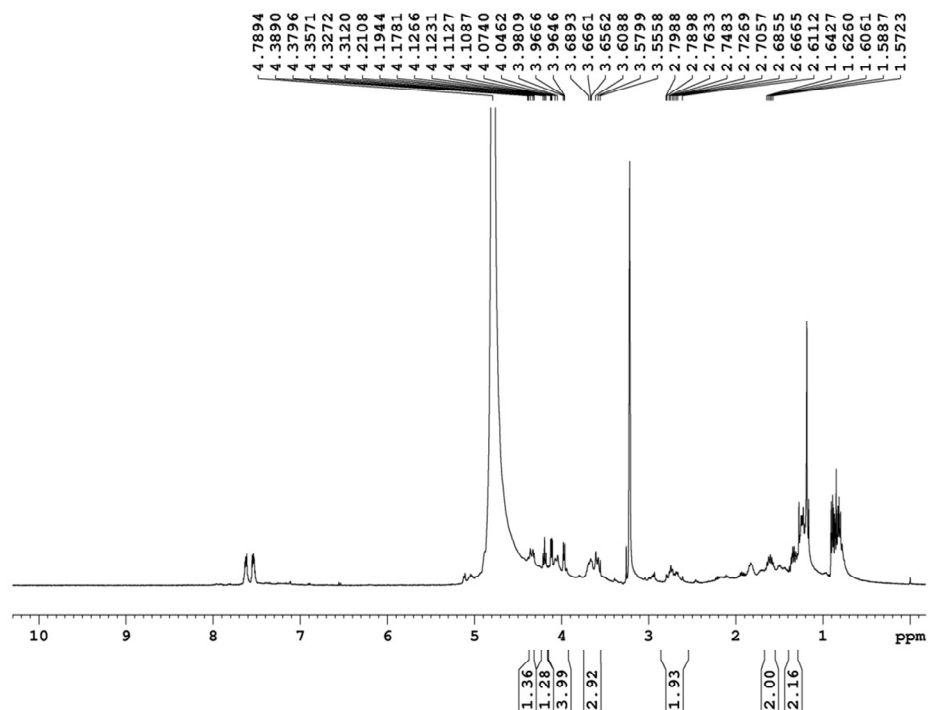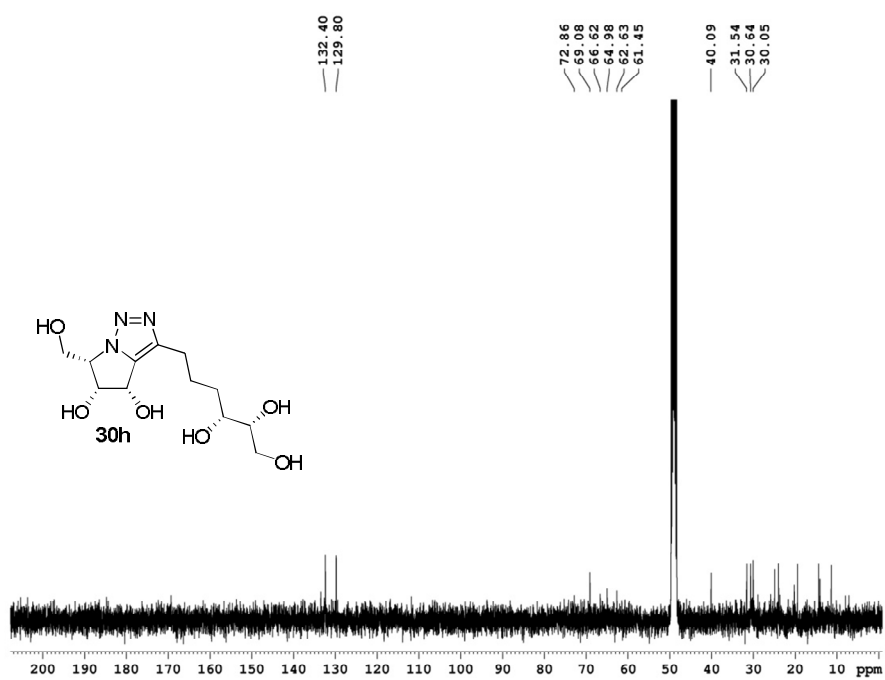

**<sup>1</sup>H and <sup>13</sup>C NMR Spectrum of 30h**

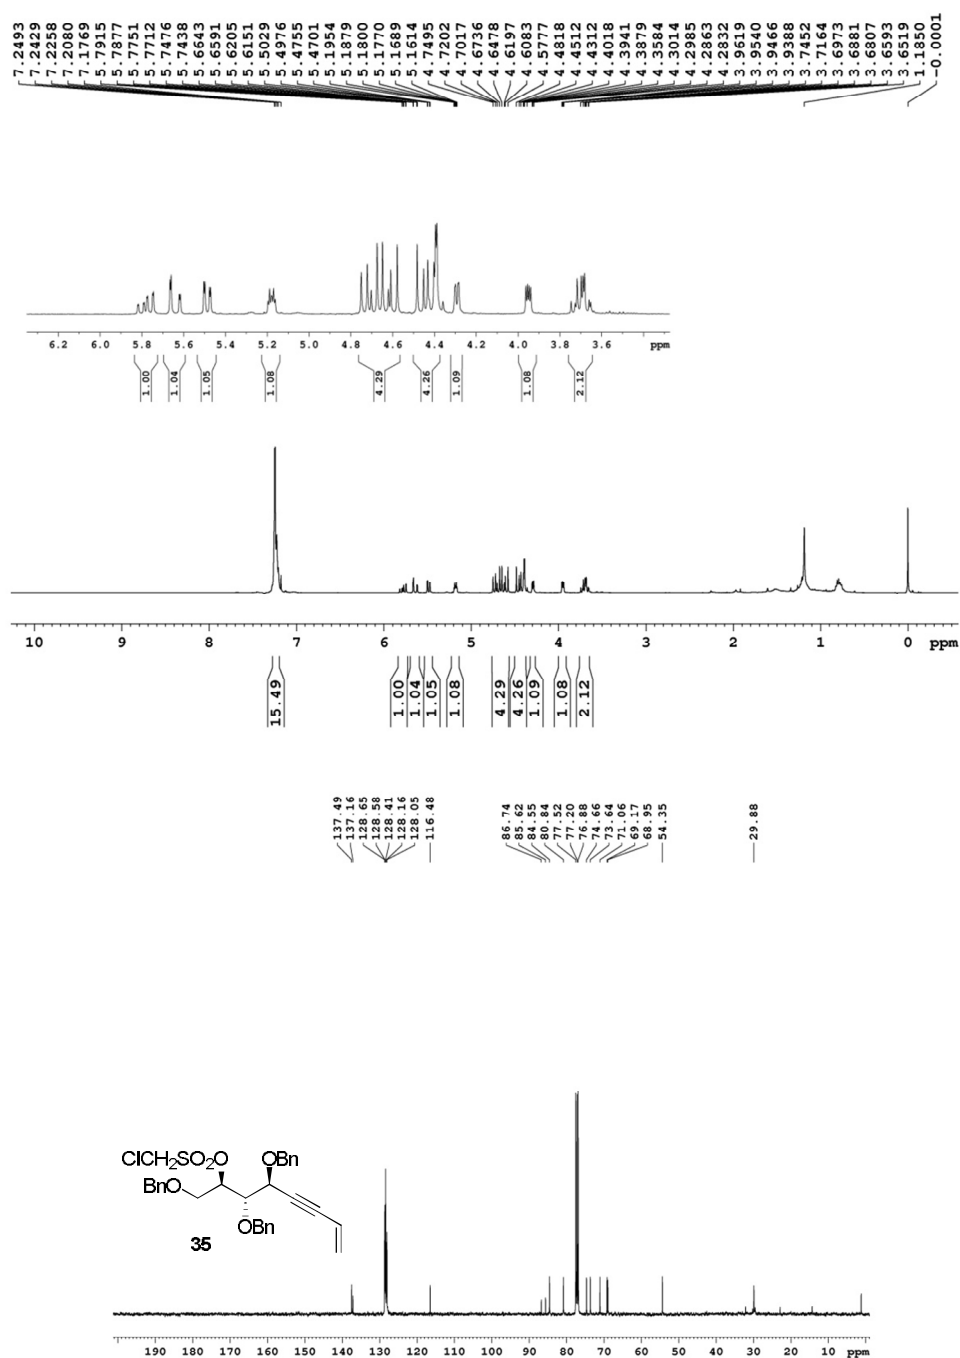

**<sup>1</sup>H and <sup>13</sup>C NMR Spectrum of 35**



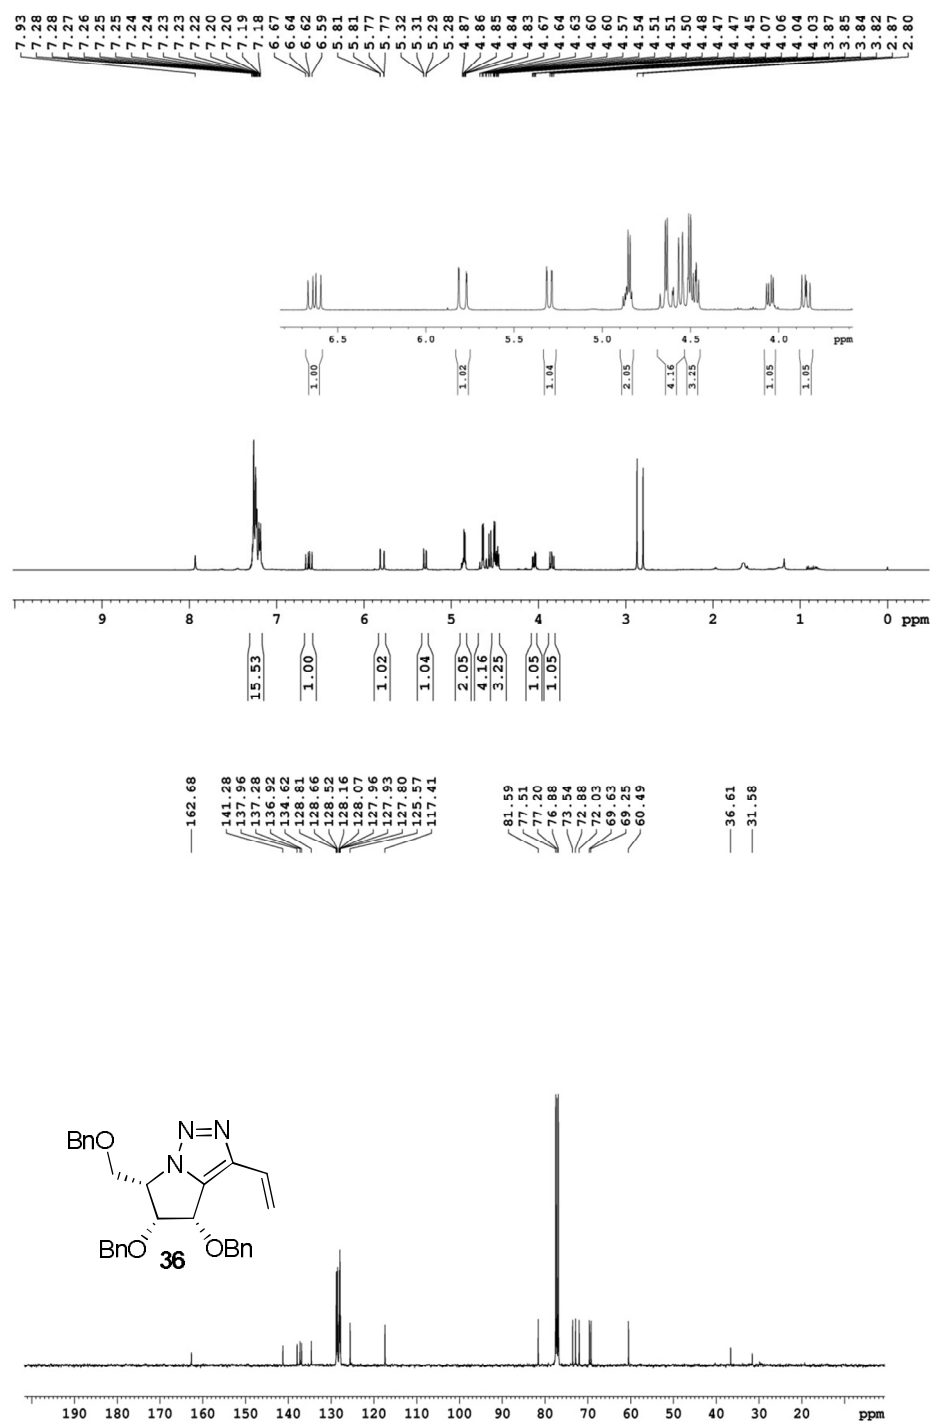

**<sup>1</sup>H and <sup>13</sup>C NMR Spectrum of 36**

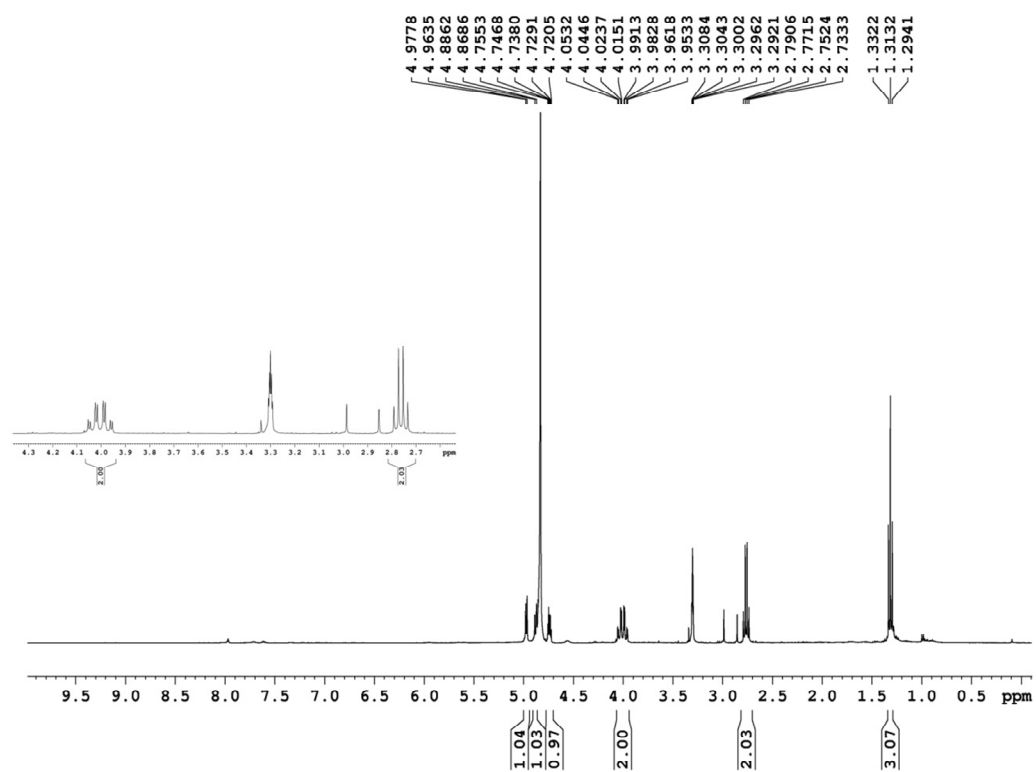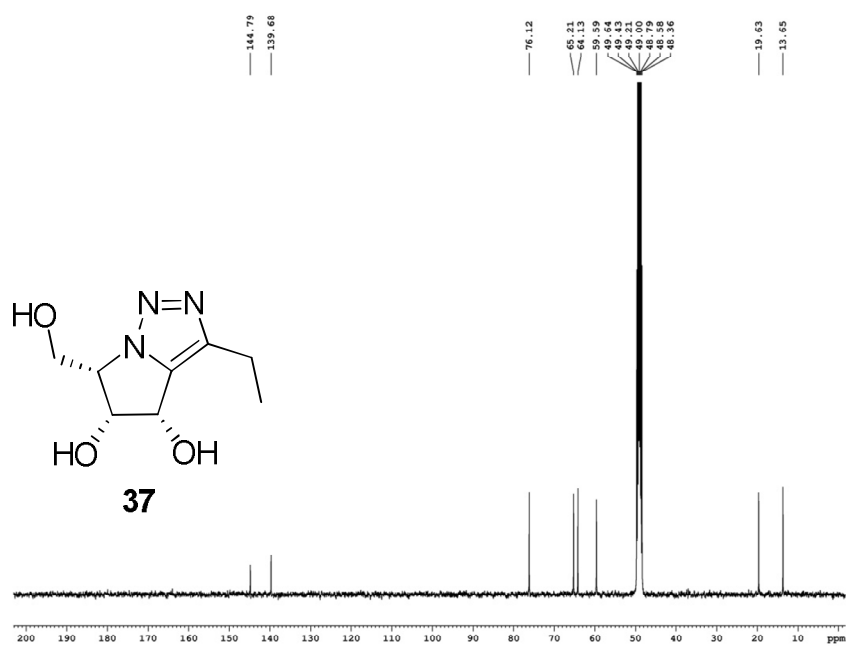

**<sup>1</sup>H and <sup>13</sup>C NMR Spectrum of **37****

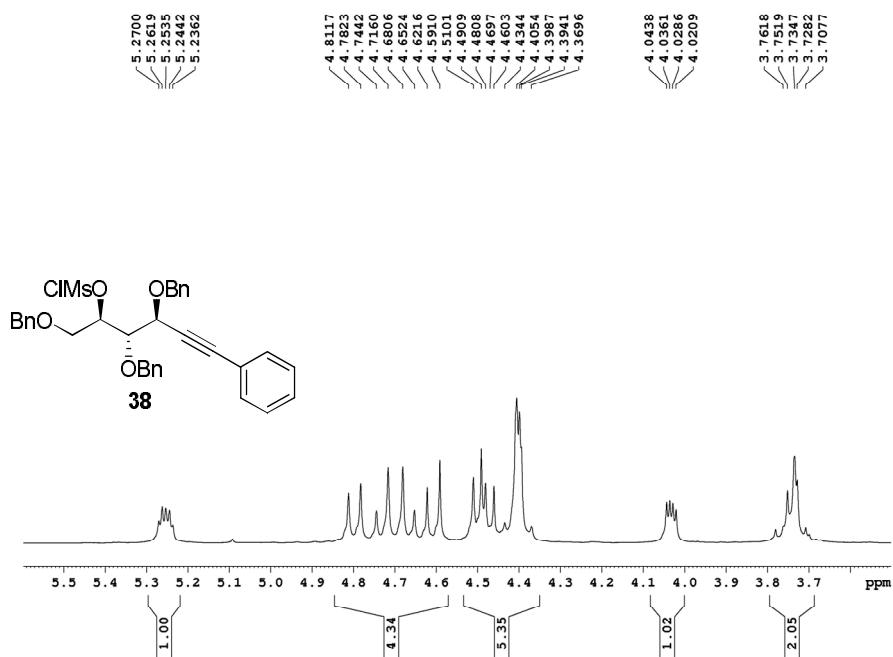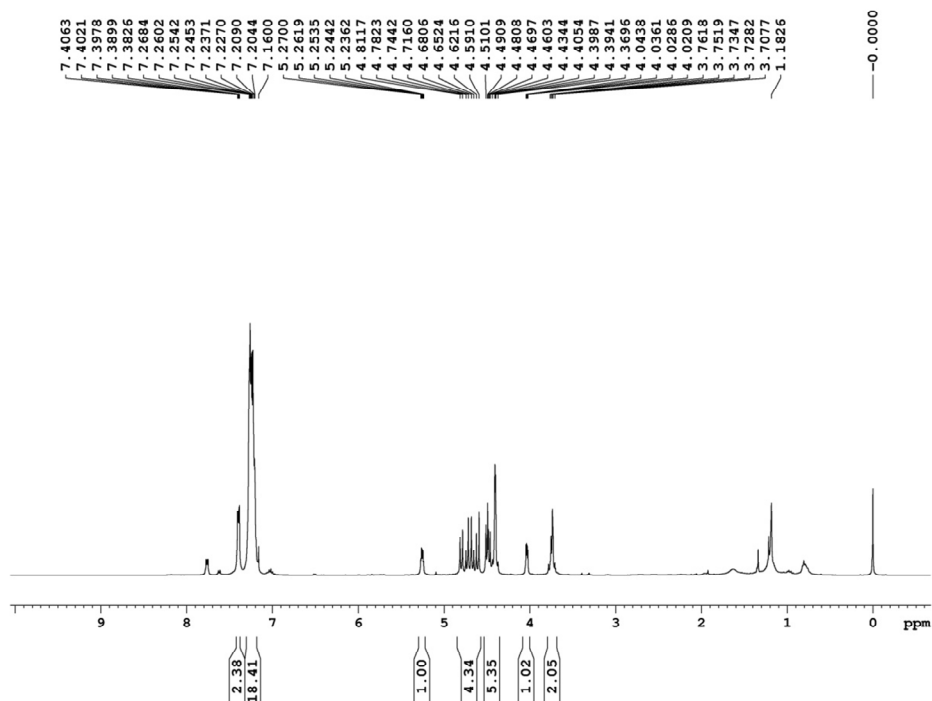

**$^1\text{H}$  NMR Spectrum of 38**



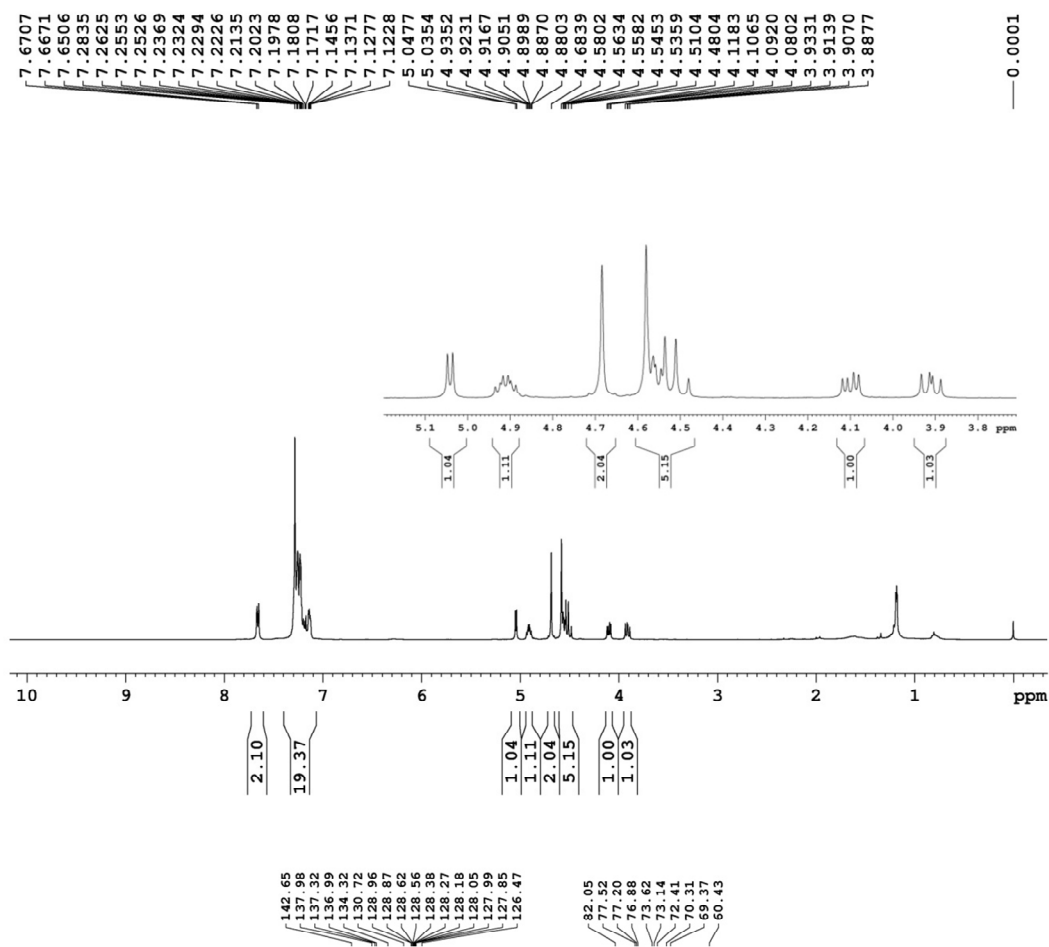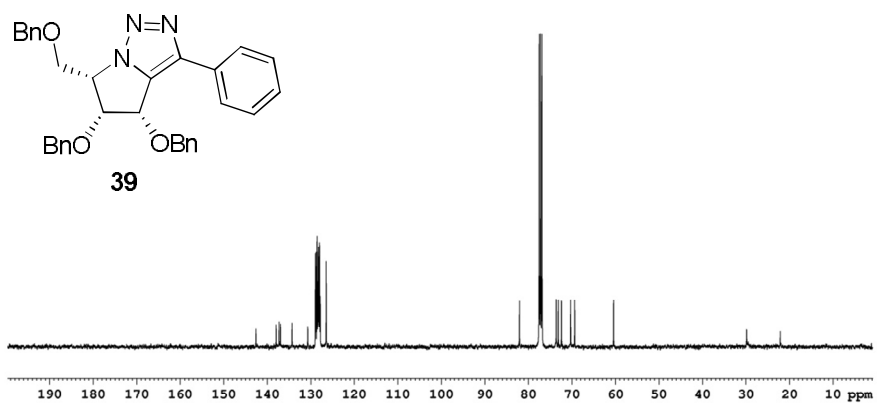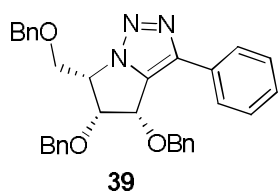

**<sup>1</sup>H and <sup>13</sup>C NMR Spectrum of 39**

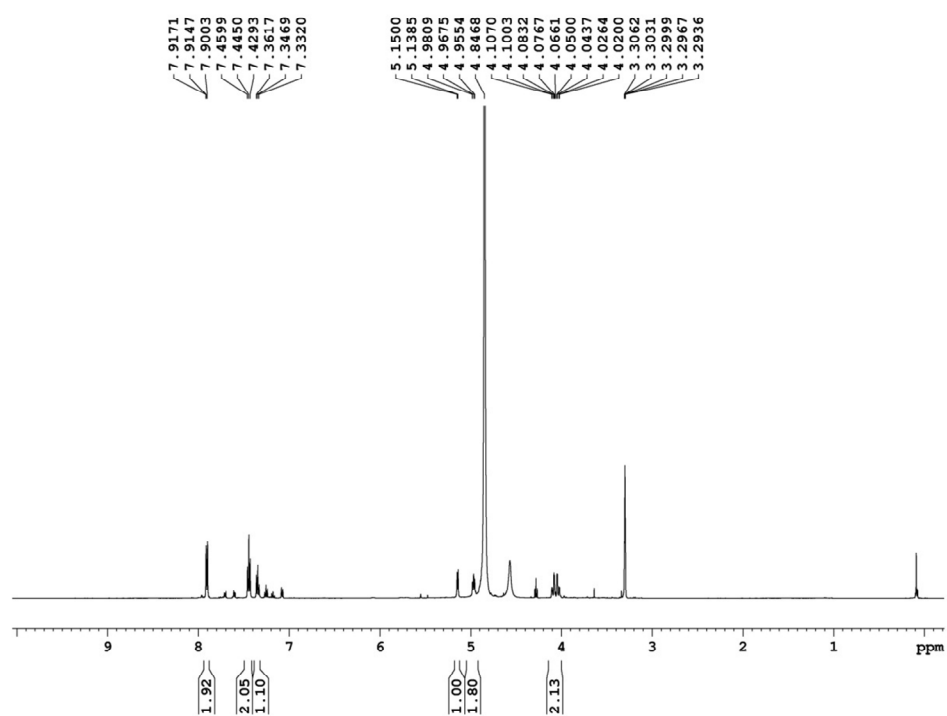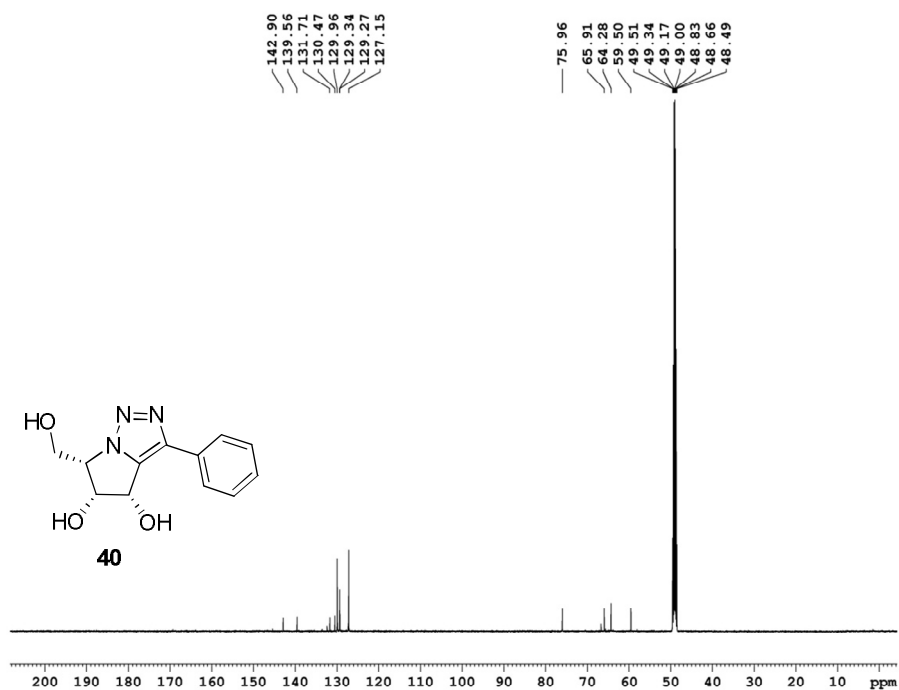

**<sup>1</sup>H and <sup>13</sup>C NMR Spectrum of 40**

## Glycosidase Inhibition

General Methods are mentioned in the manuscript text. Inhibition potencies of compounds were determined according to Gunter and Stefan (1986), Li *et al* (2011) by minute modifications, measuring the residual hydrolytic activities of glycosidase of the corresponding *p*-nitrophenyl glycosides in presences of compounds spectrophotometrically. Michaelis-Menten plot of Activity versus Substrate concentration for inhibition and  $K_i$  were determined by nonlinear regression using data to a competitive inhibition model using Graph Pad Prism (version 6.01 for Windows, Graph Pad Software, San Diego California (USA)).<sup>1-3</sup>

**Table S1: List of enzymes, respective substrates, buffers and optimum incubation temperatures.**

| S.No | Enzyme                                          | Substrate                                           | Buffer                                   | Incubation temperature. |
|------|-------------------------------------------------|-----------------------------------------------------|------------------------------------------|-------------------------|
| 1    | $\alpha$ -galactosidase (green coffee bean)     | <i>p</i> -nitrophenyl $\alpha$ -D-galactopyranoside | Citrate phosphate buffer (50 mM, pH 6.5) | 25°C                    |
| 2    | $\beta$ -galactosidase ( <i>bovine liver</i> )  | <i>p</i> -nitrophenyl $\beta$ -D-galactosidase      | Citrate phosphate buffer (50 mM, pH 4.5) | 30°C                    |
| 3    | $\alpha$ -mannosidase (jack bean)               | <i>p</i> -nitrophenyl $\alpha$ -D-mannopyranoside   | Acetate buffer (50 mM, pH 4.5)           | 25 °C                   |
| 4    | $\beta$ -glucosidase (almond)                   | <i>p</i> -nitrophenyl $\beta$ -D-glucopyranoside    | Citrate phosphate buffer (50 mM, pH 5.5) | 37 °C                   |
| 5    | $\alpha$ -glucosidase (yeast)                   | <i>p</i> -nitrophenyl $\alpha$ -D-glucopyranoside   | Citrate phosphate buffer (50 mM, pH 6.8) | 37 °C                   |
| 6    | Glucosidase ( <i>A. niger</i> )                 | <i>p</i> -nitrophenyl $\alpha$ -D-glucopyranoside   | Citrate phosphate buffer (50 mM, pH 6.8) | 37 °C                   |
| 7    | $\alpha$ -glucosidase (rice)                    | <i>p</i> -nitrophenyl $\alpha$ -D-glucopyranoside   | Citrate phosphate buffer (50 mM, pH 6.8) | 37 °C                   |
| 8    | $\alpha$ -L-fucosidase ( <i>bovine kidney</i> ) | 4-nitrophenyl $\alpha$ -L-fucopyranoside            | Citrate phosphate buffer (50 mM, pH 5)   | 30 °C                   |

**Table S2: % of inhibition of glycosidases by 30a-e, 30g, 30h and 37 at 400  $\mu$ M.**

| <b>(% of inhibition at 400 <math>\mu</math>M)</b> |             |             |              |              |             |              |              |             |
|---------------------------------------------------|-------------|-------------|--------------|--------------|-------------|--------------|--------------|-------------|
| <b>Enzyme</b>                                     | <b>30a</b>  | <b>30e</b>  | <b>30b</b>   | <b>30c</b>   | <b>30d</b>  | <b>30h</b>   | <b>30g</b>   | <b>37</b>   |
| $\alpha$ -galactosidase<br>(green coffee bean)    | <b>3.74</b> | <b>1.7</b>  | <b>0.34</b>  | <b>0.34</b>  | <b>0</b>    | <b>1.7</b>   | <b>2.89</b>  | <b>3.23</b> |
| $\beta$ -galactosidase<br>(bovine liver)          | <b>4.93</b> | <b>3.15</b> | <b>0.16</b>  | <b>1.49</b>  | <b>1.49</b> | <b>64.59</b> | <b>63.74</b> | <b>5.47</b> |
| $\alpha$ -mannosidase<br>(jack bean)              | <b>1.4</b>  | <b>1.4</b>  | <b>0.9</b>   | <b>0.7</b>   | <b>2.83</b> | <b>0</b>     | <b>0</b>     | <b>3.3</b>  |
| $\beta$ -glucosidase<br>(almond)                  | <b>2.7</b>  | <b>1.72</b> | <b>0</b>     | <b>0.57</b>  | <b>0.95</b> | <b>0</b>     | <b>0</b>     | <b>2.86</b> |
| $\alpha$ -glucosidase<br>(yeast)                  | <b>4.79</b> | <b>5.43</b> | <b>84.51</b> | <b>93.73</b> | <b>4.15</b> | <b>90.27</b> | <b>90.63</b> | <b>3.83</b> |
| Glucosidase ( <i>A. niger</i> )                   | <b>5.93</b> | <b>5.42</b> | <b>1.01</b>  | <b>0.84</b>  | <b>2.54</b> | <b>0</b>     | <b>0.84</b>  | <b>0.84</b> |
| $\alpha$ -glucosidase<br>(rice)                   | <b>2.94</b> | <b>4.85</b> | <b>1.47</b>  | <b>1.17</b>  | <b>1.17</b> | <b>0.29</b>  | <b>1.47</b>  | <b>3.52</b> |
| $\alpha$ -L-fucosidase<br>(bovine kidney)         | <b>3.26</b> | <b>3.95</b> | <b>2.92</b>  | <b>97.12</b> | <b>3.09</b> | <b>93.63</b> | <b>2.40</b>  | <b>0.34</b> |



**Table S3: % of inhibition of glycosidases by 30a-e, 30g, 30h and 37 at 1000  $\mu$ M.**

| (% of inhibition at 1000 $\mu$ M)              |             |             |              |              |             |              |              |             |
|------------------------------------------------|-------------|-------------|--------------|--------------|-------------|--------------|--------------|-------------|
| <b>Enzyme</b>                                  | <b>30a</b>  | <b>30e</b>  | <b>30b</b>   | <b>30c</b>   | <b>30d</b>  | <b>30h</b>   | <b>30g</b>   | <b>37</b>   |
| $\alpha$ -galactosidase<br>(green coffee bean) | <b>4.93</b> | <b>3.74</b> | <b>2.04</b>  | <b>1.36</b>  | <b>1.36</b> | <b>3.06</b>  | <b>2.04</b>  | <b>4.76</b> |
| $\beta$ -galactosidase<br>(bovine liver)       | <b>6.13</b> | <b>6.30</b> | <b>2.48</b>  | <b>2.82</b>  | <b>3.48</b> | <b>69.94</b> | <b>66.49</b> | <b>6.80</b> |
| $\alpha$ -mannosidase<br>(jack bean)           | <b>3.70</b> | <b>3.70</b> | <b>2.10</b>  | <b>3.70</b>  | <b>6.14</b> | <b>0.70</b>  | <b>0.70</b>  | <b>5.66</b> |
| $\beta$ -glucosidase<br>(almond)               | <b>4.78</b> | <b>4.78</b> | <b>0.57</b>  | <b>0.57</b>  | <b>2.48</b> | <b>0</b>     | <b>0</b>     | <b>4.78</b> |
| $\alpha$ -glucosidase<br>(yeast)               | <b>7.66</b> | <b>7.34</b> | <b>89.62</b> | <b>95.97</b> | <b>4.58</b> | <b>92.83</b> | <b>95.68</b> | <b>4.47</b> |
| Glucosidase ( <i>A. niger</i> )                | <b>7.11</b> | <b>7.11</b> | <b>3.55</b>  | <b>1.69</b>  | <b>5.08</b> | <b>0</b>     | <b>1.69</b>  | <b>2.03</b> |
| $\alpha$ -glucosidase<br>(rice)                | <b>5.58</b> | <b>6.61</b> | <b>2.20</b>  | <b>2.94</b>  | <b>4.41</b> | <b>1.76</b>  | <b>2.94</b>  | <b>6.81</b> |
| $\alpha$ -L-fucosidase<br>(bovine kidney)      | <b>4.29</b> | <b>4.46</b> | <b>4.41</b>  | <b>97.84</b> | <b>5.15</b> | <b>95.59</b> | <b>2.92</b>  | <b>2.92</b> |

Figures 1-8 represent Michaelis-Menten plot of Activity versus Substrate concentration for inhibition of various enzymes (see methods) by compounds 30b, 30c, 30 g and 30h. The  $K_i$  were determined by nonlinear regression using Graph Pad Prism (version 6.01 for Windows, Graph Pad Software, San Diego California USA). These curves show that the inhibition is competitive. Activity represented absorbance of liberated *p*-nitrophenol measured at 405 nm.

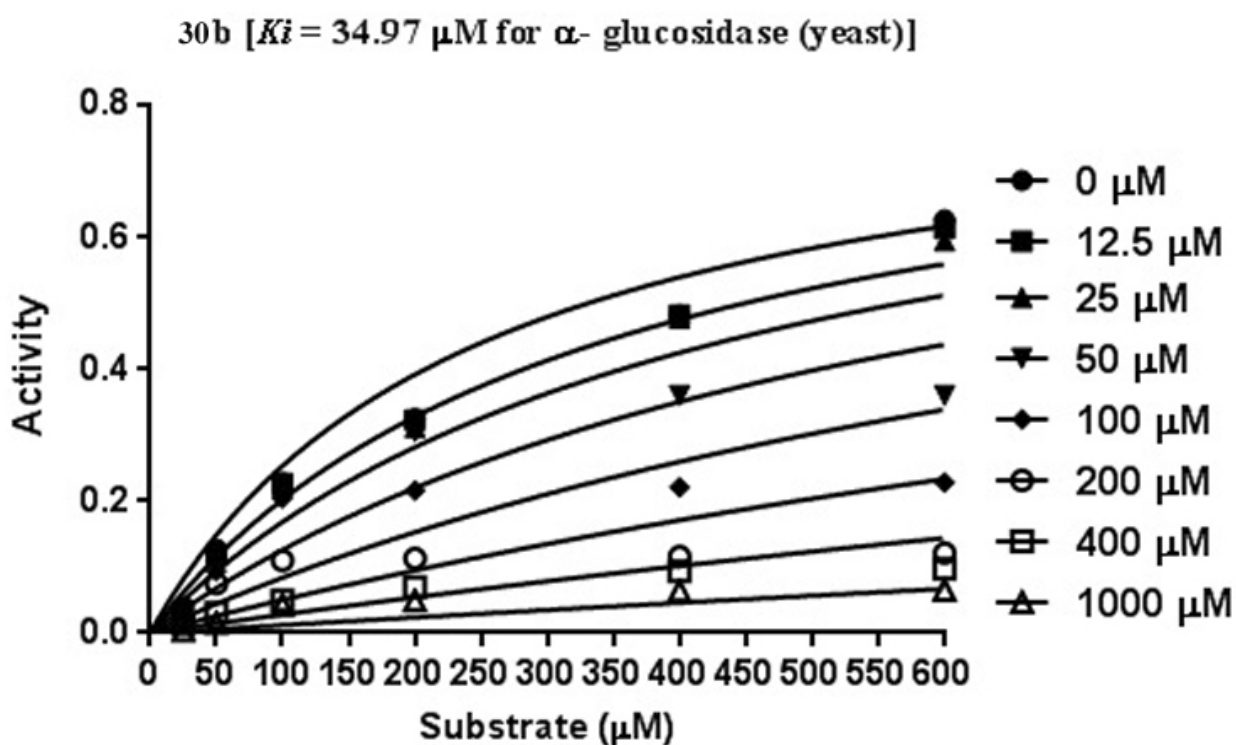

Figure 1

30c [ $K_i = 13.97 \mu\text{M}$  for  $\alpha$ - glucosidase (yeast)]

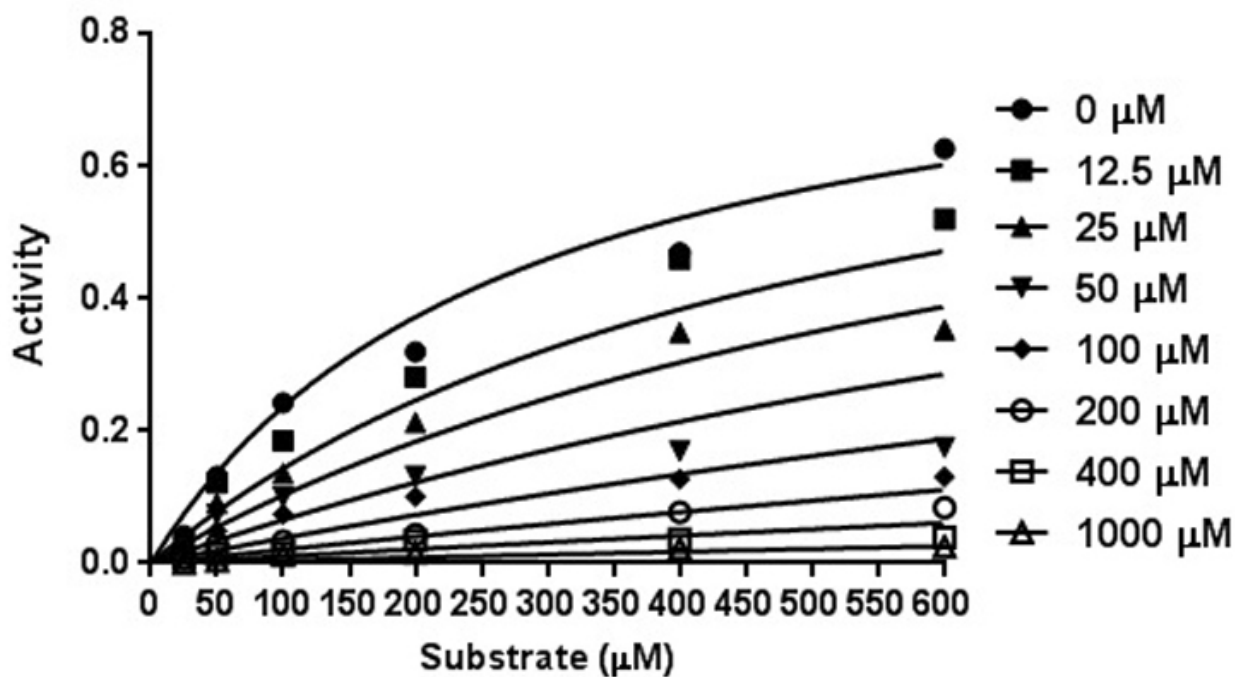

Figure 2

30c [ $K_i = 9.67 \mu\text{M}$  for  $\alpha$ - L- fucosidase (bovine kidney)]

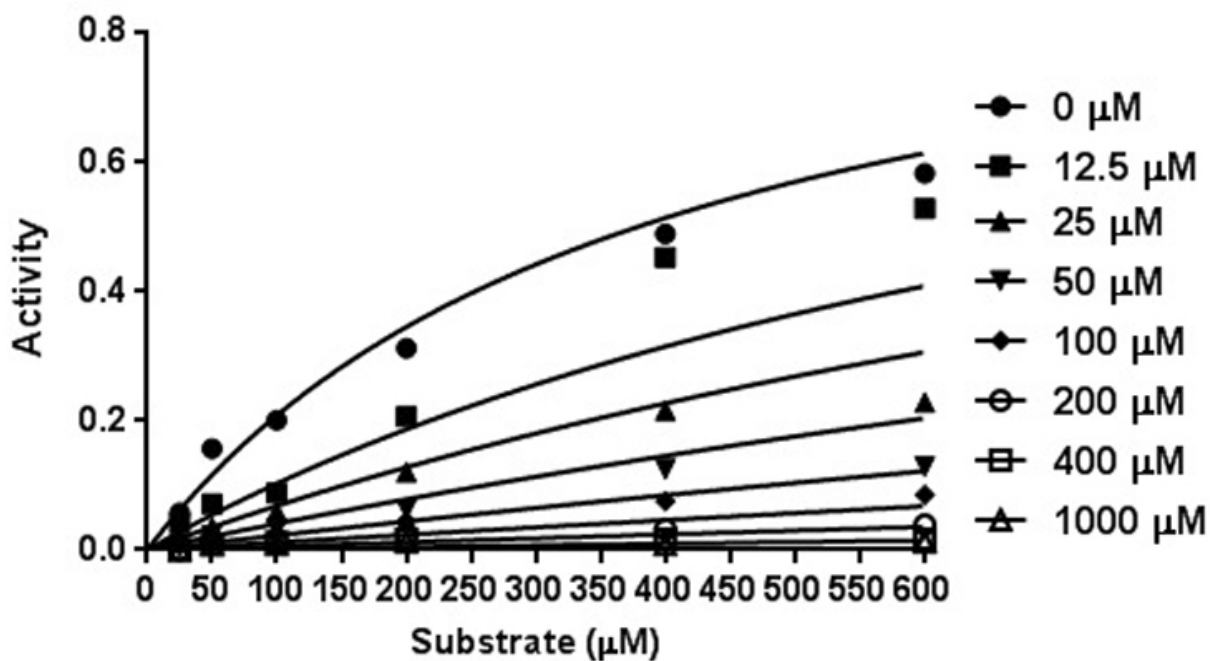

Figure 3

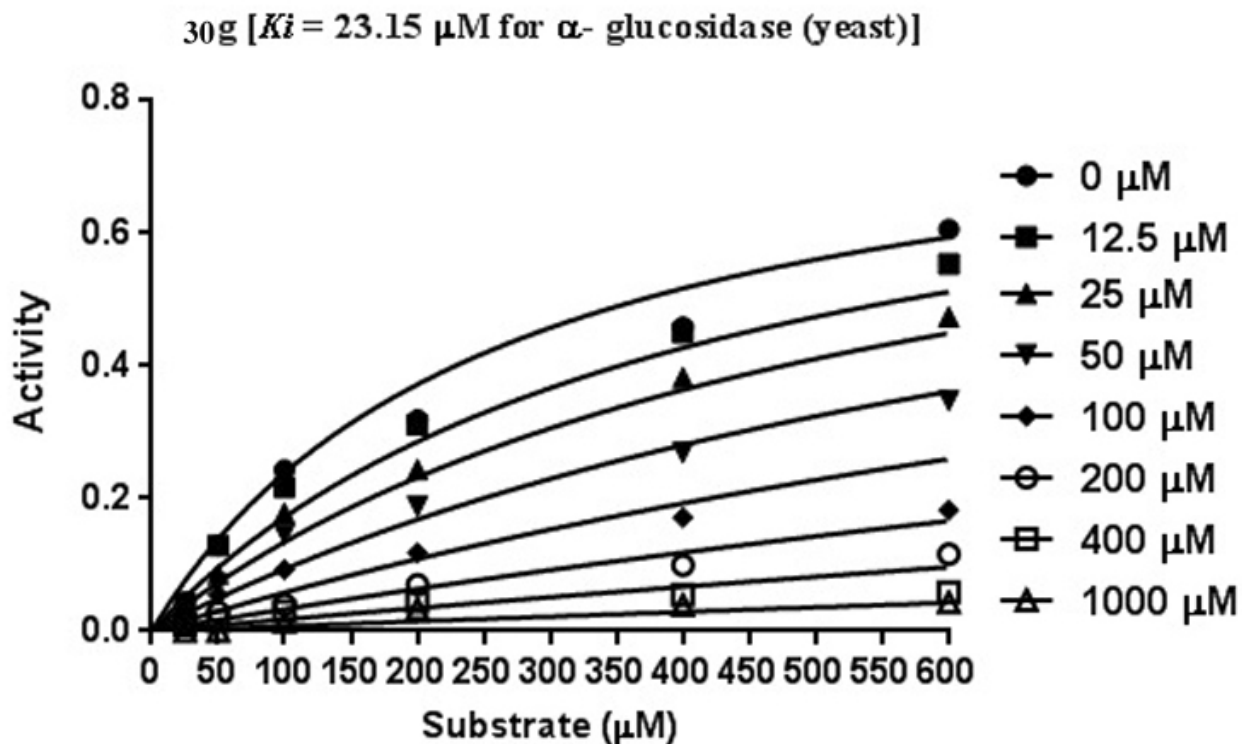

Figure 4

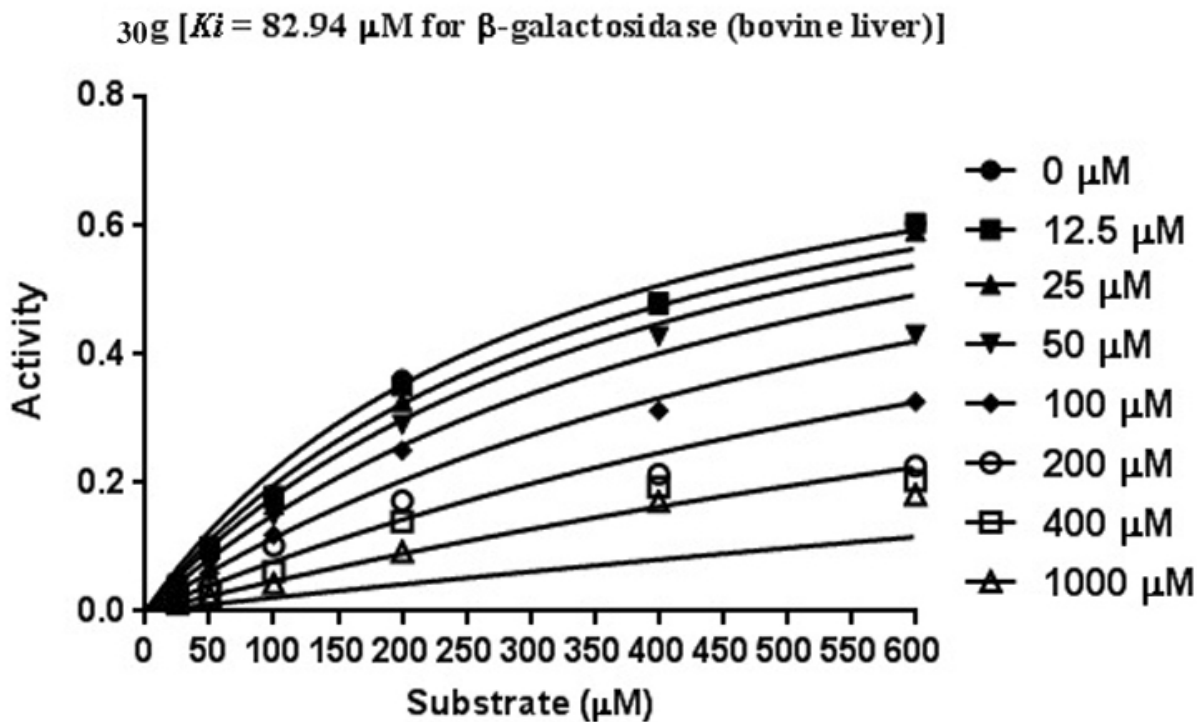

Figure 5

30h [ $K_i = 14.13 \mu\text{M}$  for  $\alpha$ -glucosidase (yeast)]

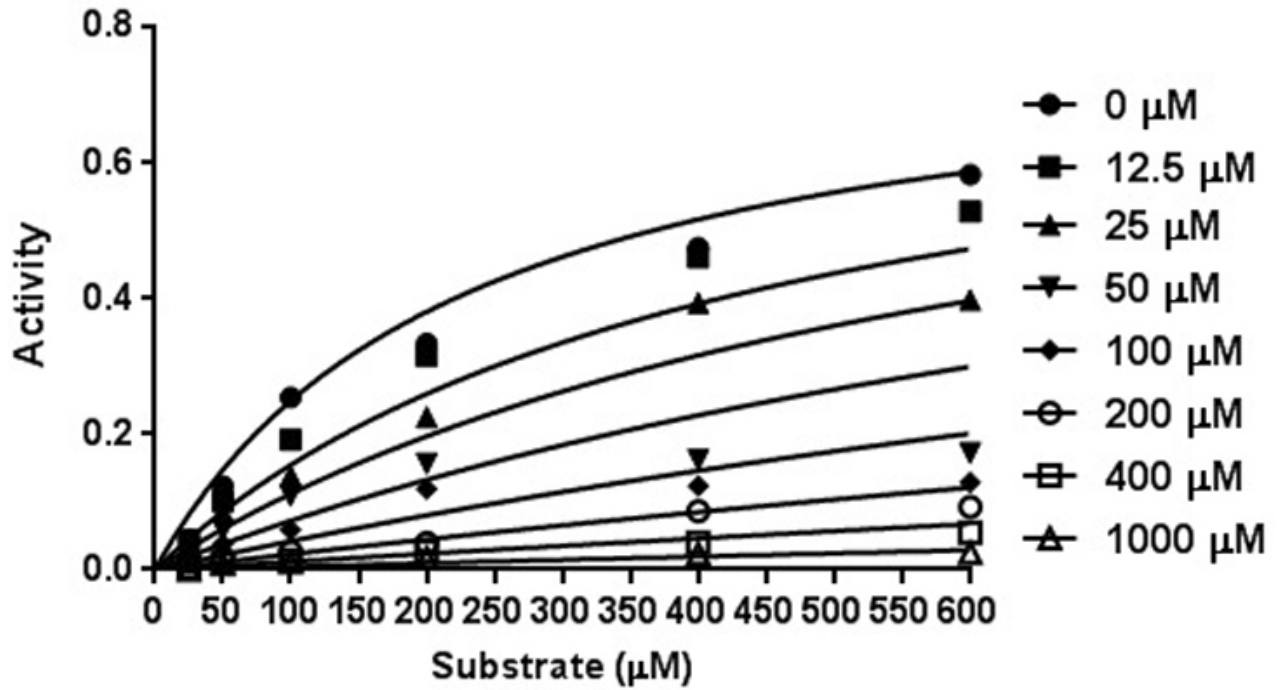

Figure 6

30h [ $K_i = 100.60 \mu\text{M}$  for  $\beta$ -galactosidase (bovine liver)]

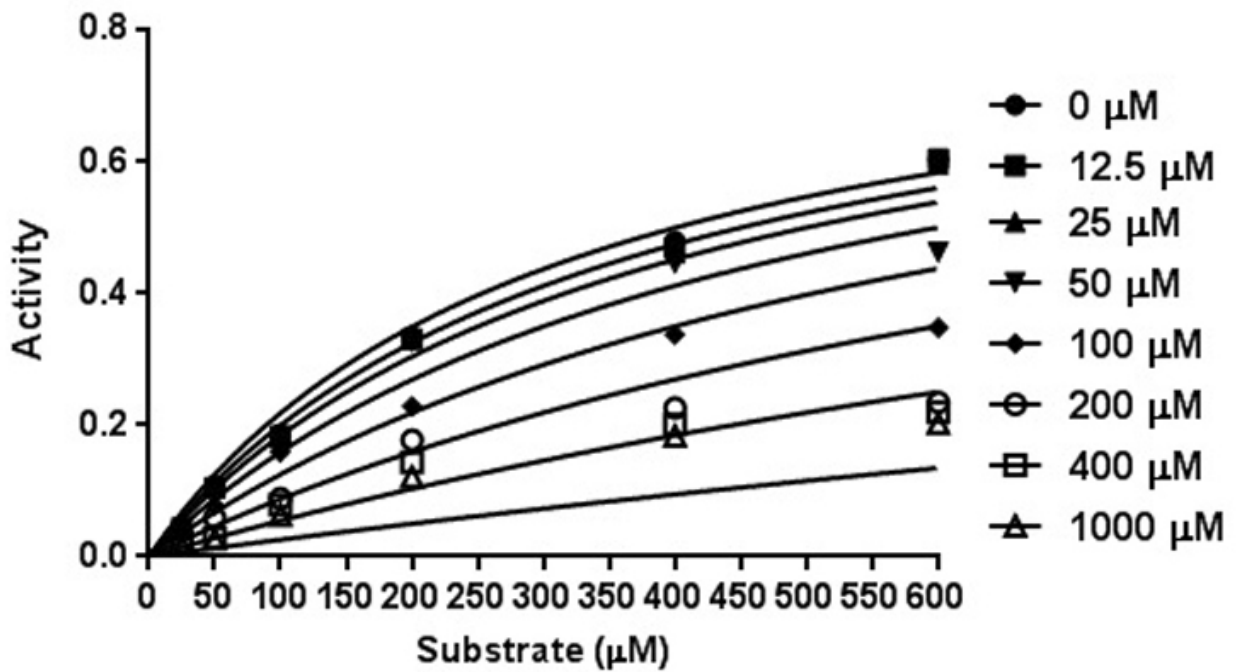

Figure 7

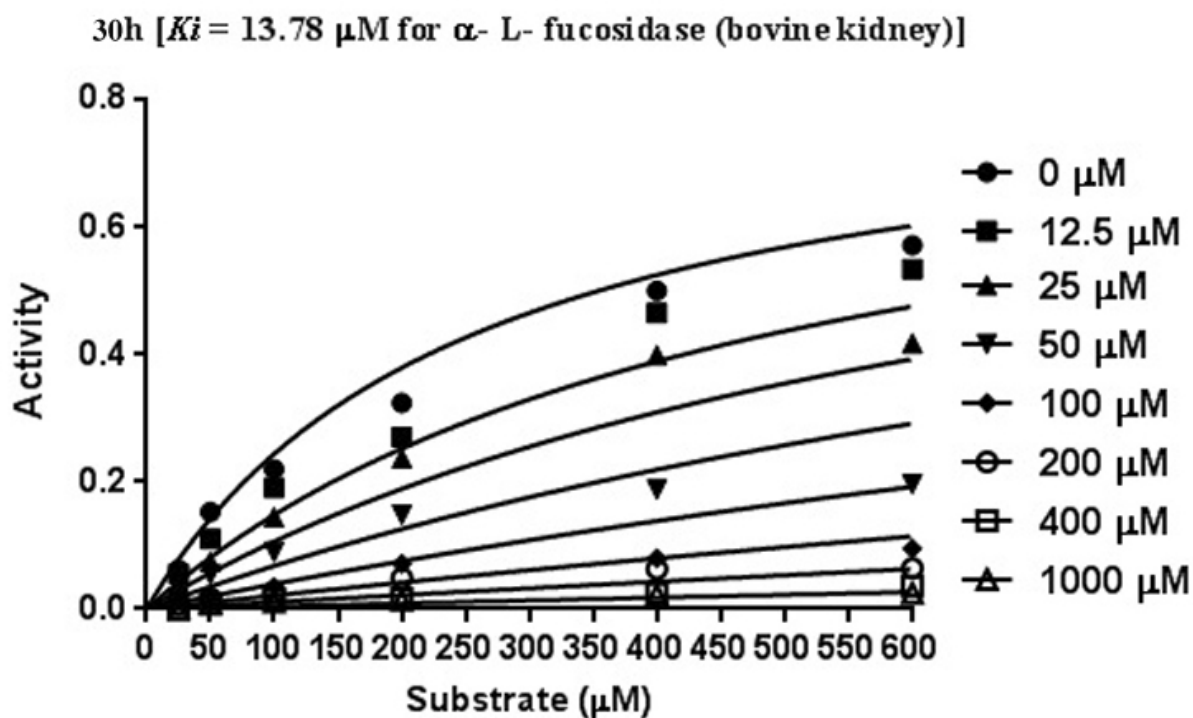

Figure 8

## References

1. L. Gunter and P. Stefan, *Carbohydr. Res.*, 1986, **155**, 119-129.
2. Y. X. Li, M. H. Huang, Y. Yamashita, A. Kato, Y. M. Jia, W. B. Wang, G. W. J. Fleet, R. J. Nash and C. Yu, *Org. Biomol. Chem.*, 2011, **9**, 3405-3414.
3. K. Wagschal, D. Franqui-Espiet, C. C Lee, R. E. Kibblewhite-Accinelli, G. H. Robertson and D. W. S. Wong, *Enzyme Microb. Technol.*, 2007, **4**, 747-753.
